# Supplementary material for: Targeting Cholesterol Biosynthesis with Statins Synergizes with AKT Inhibitors in Triple-Negative Breast Cancer
Source: PubMed Central journal article supplement — Cancer Res. 2024 Jul 18;84(19):3250–66. doi: 10.1158/0008-5472.CAN-24-0970 (PMC11443248; doi:10.1158/0008-5472.can-24-0970), 2024-07-18
Supplement: can-24-0970_supplementary_data_suppsd.pdf [file can-24-0970_supplementary_data_suppsd.pdf]

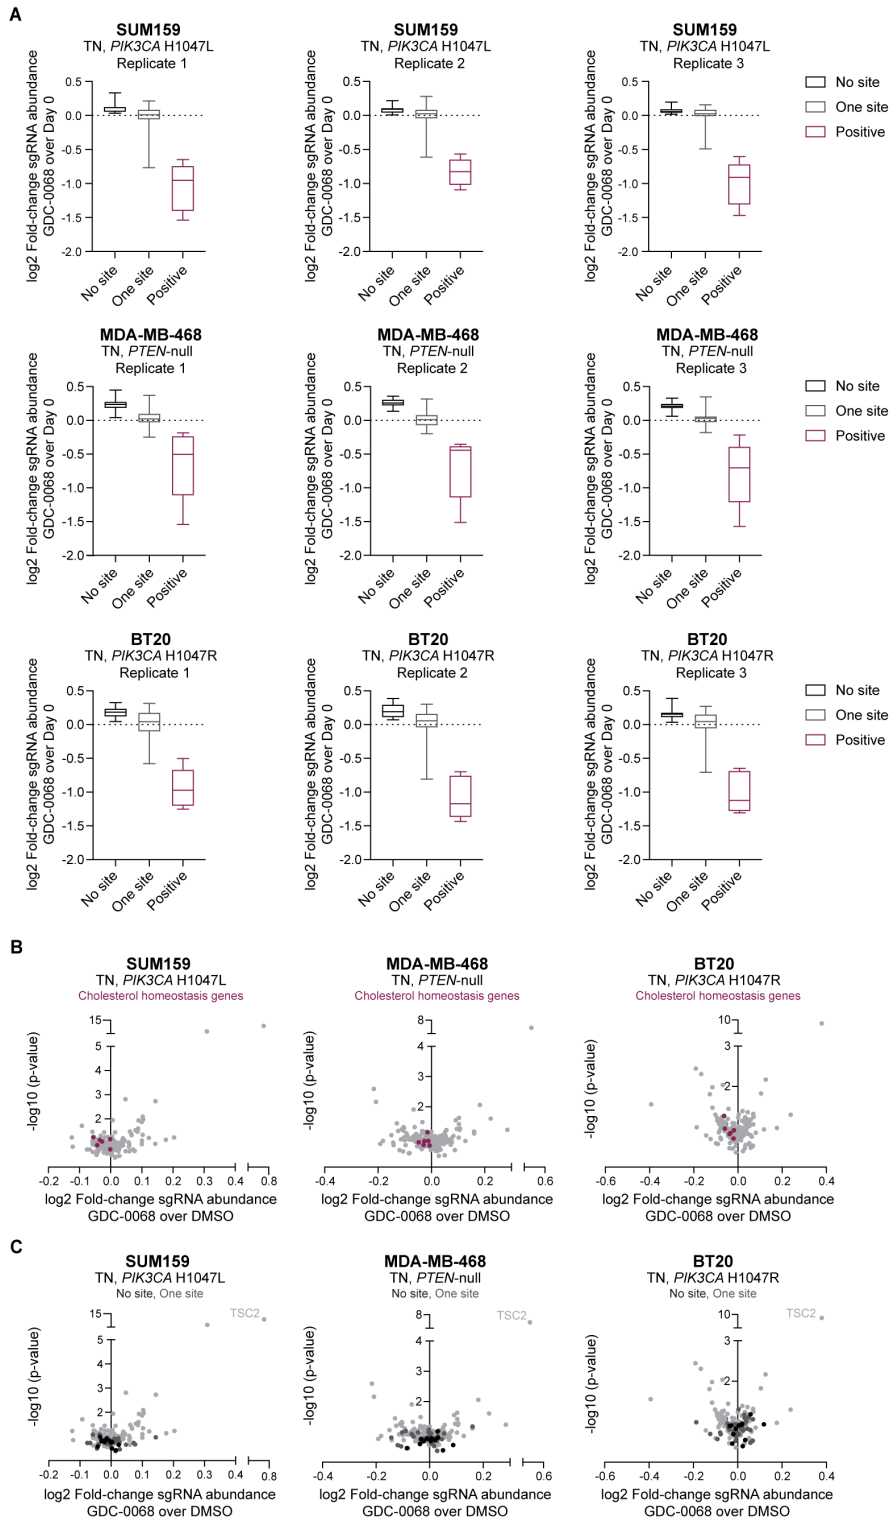

- 1 **Supplementary Figure S1. Custom CRISPR/Cas9 minipool library screen validates cholesterol**
- 2 **homeostasis hits in a panel of TNBC cells. A, Comparison of the log<sub>2</sub> fold-change in sgRNA**
- 3 **abundance for no site, one site and positive control sgRNAs in the GDC-0068 arm compared to the day 0**

4 arm of the custom CRISPR/Cas9 minipool library screen. No site sgRNAs do not cut anywhere in the  
5 genome. One site sgRNAs introduce single cuts in the genome at intergenic sites that are predicted to  
6 have little to no deleterious effects. Positive control sgRNAs target genes that are essential for cell  
7 viability. Data are plotted as box and whisker plots by replicate for SUM159, MDA-MB-468 and BT20  
8 cells. The box extends from the 25<sup>th</sup> to 75<sup>th</sup> percentiles, and whiskers extend from minimum to maximum  
9 values. **B**, Volcano plots showing log<sub>2</sub> fold-change in sgRNA abundance in the GDC-0068 arm (SUM159:  
10 4.34 μM, MDA-MB-468: 8.49 μM, BT20: 0.9 μM) of the custom CRISPR/Cas9 minipool screen compared  
11 to the DMSO arm versus -log<sub>10</sub> (p-value). Cholesterol homeostasis genes with negative log<sub>2</sub> fold-  
12 changes in all three TNBC cell lines are highlighted (*ABCA12*, *ABCB4*, *CYP39A1*, *SREBF2*, *TMEM97*,  
13 *VPS4B*). Data are represented as the mean of 3 technical replicates for each cell line. **C**, Volcano plots  
14 showing log<sub>2</sub> fold-change in sgRNA abundance in the GDC-0068 arm of the custom CRISPR/Cas9  
15 minipool screen compared to the DMSO arm versus -log<sub>10</sub> (p-value). Controls are highlighted, including  
16 no site and one intergenic site controls and the positive control *TSC2*. Data are represented as the mean  
17 of 3 technical replicates for each cell line.

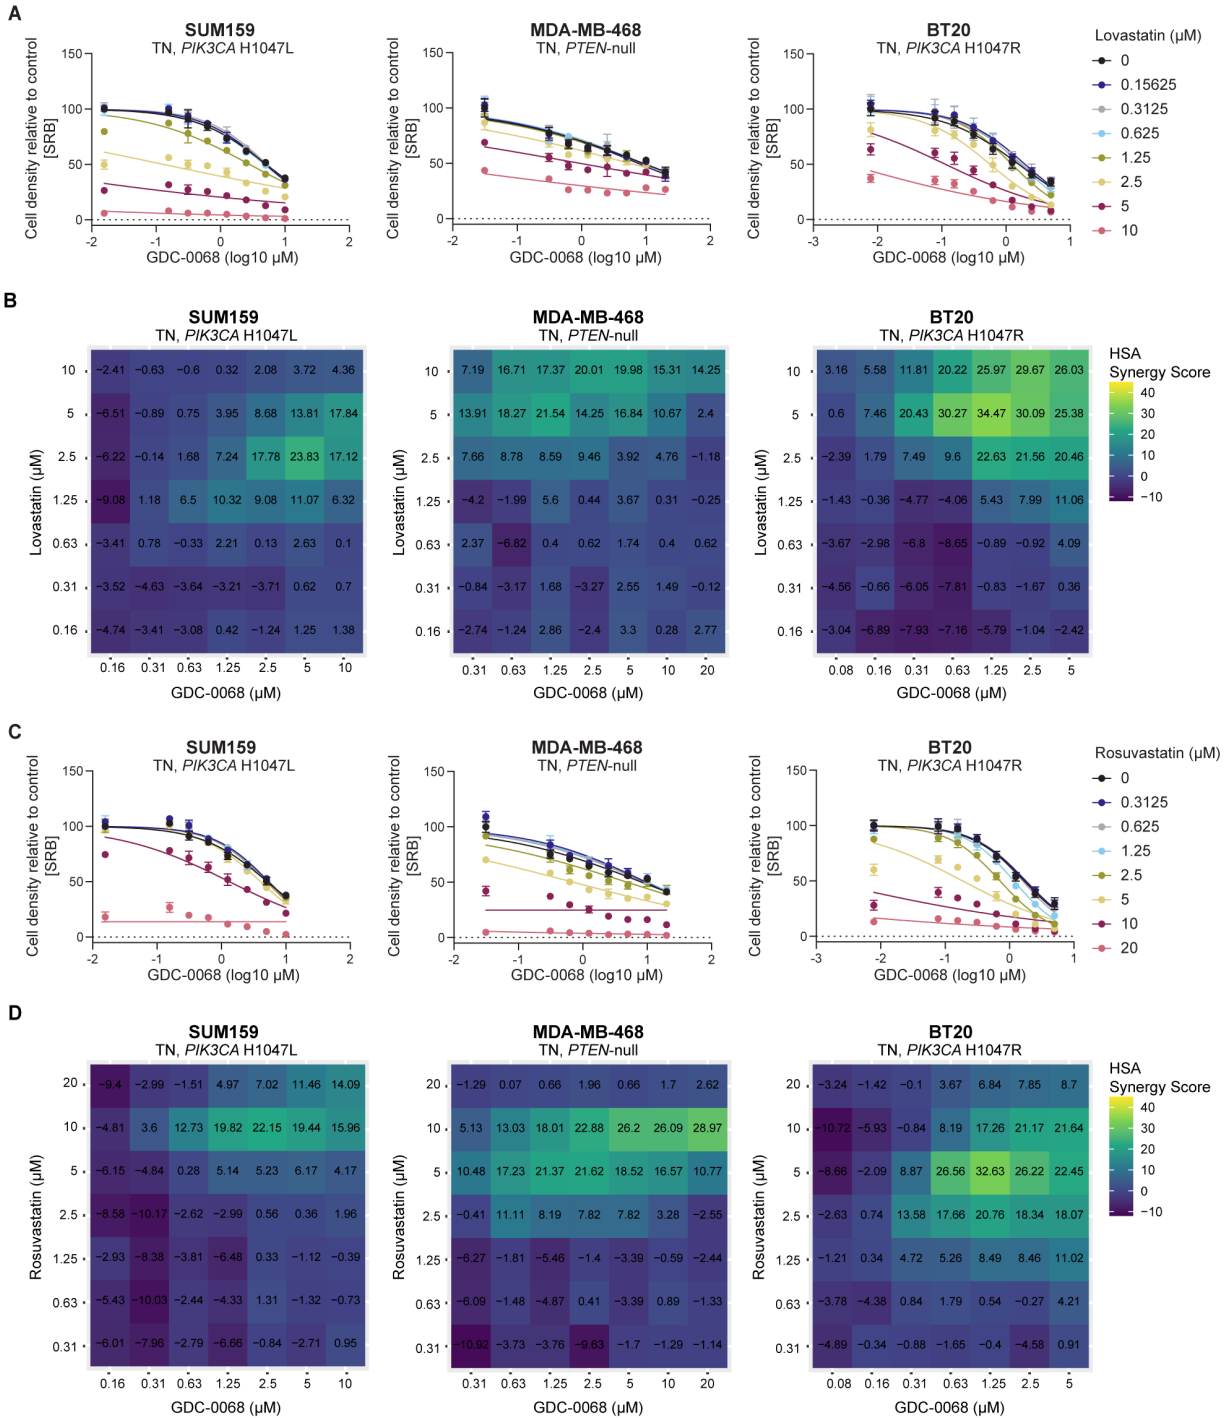

18 **Supplementary Figure S2. Lovastatin and rosuvastatin synergize with AKT inhibitors in TNBC**  
 19 **cells. A**, TNBC cell lines (SUM159, MDA-MB-468, BT20) were treated with increasing doses of GDC-  
 20 0068 (SUM159: 0-10  $\mu$ M, MDA-MB-468: 0-20  $\mu$ M, BT20: 0-5  $\mu$ M) and lovastatin (0-10  $\mu$ M) or **C**,  
 21 rosuvastatin (0-20  $\mu$ M) for 72 hours, and cell density was measured by SRB assay. Data are represented  
 22 as mean  $\pm$  SD (N=3 technical replicates). **B**, TNBC cell lines (SUM159, MDA-MB-468, BT20) were

23 treated with increasing doses of GDC-0068 (SUM159: 0-10  $\mu$ M, MDA-MB-468: 0-20  $\mu$ M, BT20: 0-5  $\mu$ M)  
24 and lovastatin (0-10  $\mu$ M) or **D**, rosuvastatin (0-20  $\mu$ M) for 72 hours, and cell density was measured by  
25 SRB assay. HSA synergy scores were calculated using SynergyFinder and are reported in the heatmaps  
26 (N=3 technical replicates).



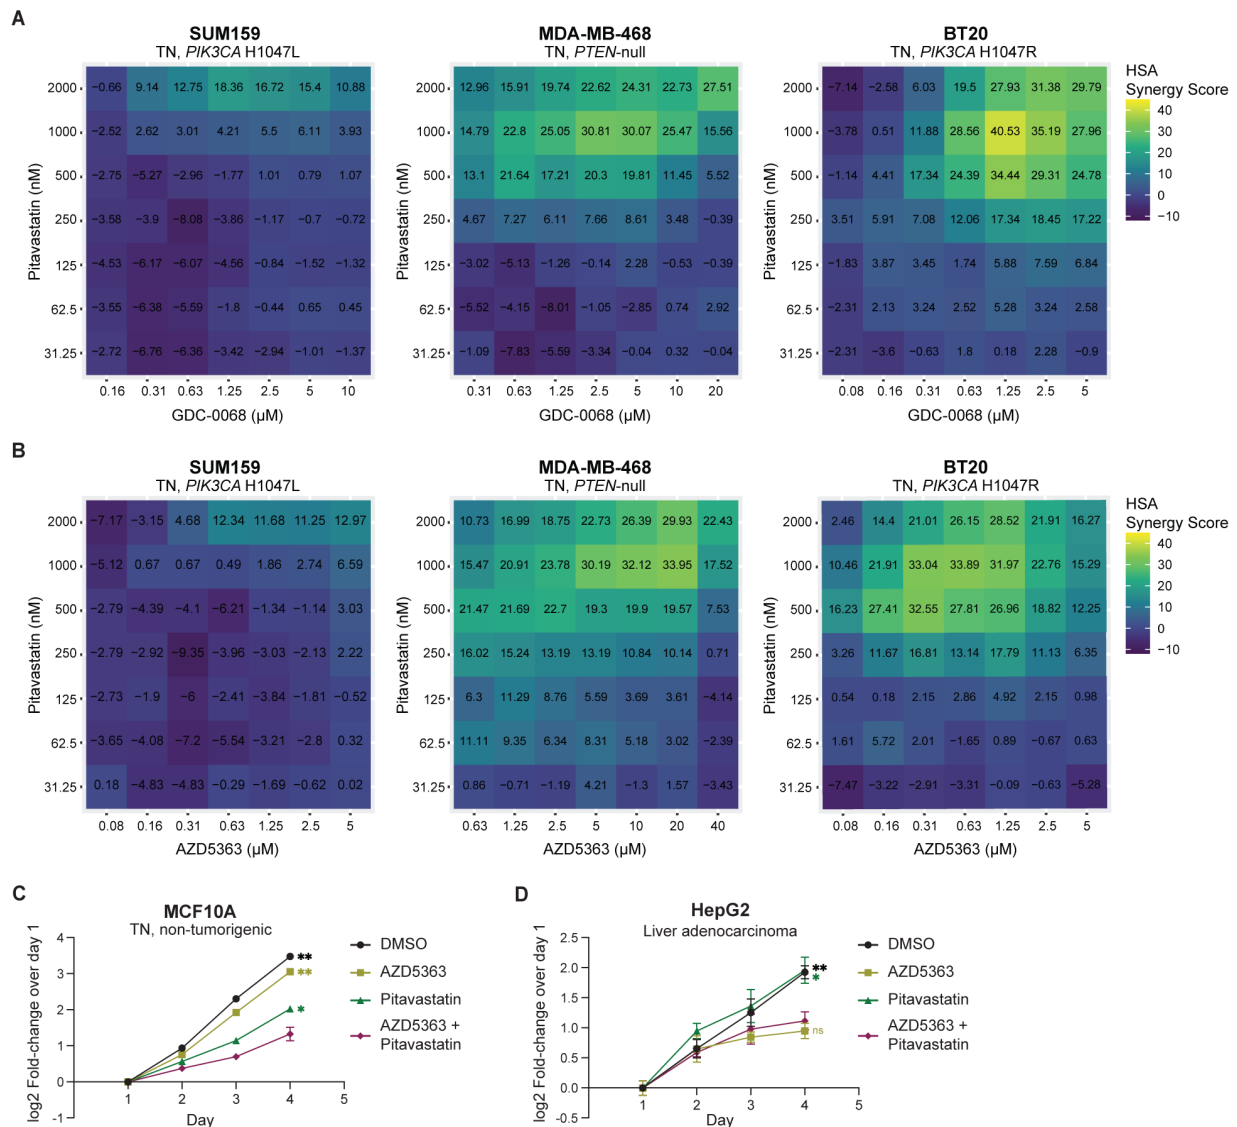

27 **Supplementary Figure S3. Pitavastatin synergizes with AKT inhibitors in TNBC cells. A-B**, TNBC  
 28 cell lines (SUM159, MDA-MB-468, BT20) were treated with increasing doses of GDC-0068 (SUM159: 0-  
 29 10  $\mu\text{M}$ , MDA-MB-468: 0-20  $\mu\text{M}$ , BT20: 0-5  $\mu\text{M}$ ) (**A**) or AZD5363 (SUM159: 0-5  $\mu\text{M}$ , MDA-MB-468: 0-40  
 30  $\mu\text{M}$ , BT20: 0-5  $\mu\text{M}$ ) (**B**) and pitavastatin (0-2000 nM) for 72 hours, and cell density was measured by SRB  
 31 assay. HSA synergy scores were calculated using SynergyFinder and are reported in the heatmaps (N=3  
 32 technical replicates). **C**, The triple-negative, non-tumorigenic mammary epithelial cell line, MCF10A, was  
 33 treated with DMSO, 3  $\mu\text{M}$  AZD5363, 2  $\mu\text{M}$  pitavastatin or a combination of AZD5363 and pitavastatin for  
 34 72 hours, and cell density was measured daily by SRB assay. Data are represented as mean  $\pm$  SD (N=3  
 35 technical replicates). Statistical analysis was performed using two-way analysis of variance (ANOVA) with

36 Dunnett's multiple comparison test; asterisks (\*) indicate significant differences compared to the AZD5363  
37 and pitavastatin combination treatment on day 4 (\*, p = 0.0332, \*\*, p = 0.0021). **D**, The liver  
38 adenocarcinoma cell line, HepG2, was treated with DMSO, 20  $\mu$ M AZD5363, 0.5  $\mu$ M pitavastatin or a  
39 combination of AZD5363 and pitavastatin for 72 hours, and cell density was measured daily by SRB  
40 assay. Data are represented as mean  $\pm$  SD (N=3 technical replicates). Statistical analysis was performed  
41 using two-way analysis of variance (ANOVA) with Dunnett's multiple comparison test; asterisks (\*)  
42 indicate significant differences compared to the AZD5363 and pitavastatin combination treatment on day  
43 4 (\*, p = 0.0332, \*\*, p = 0.0021).

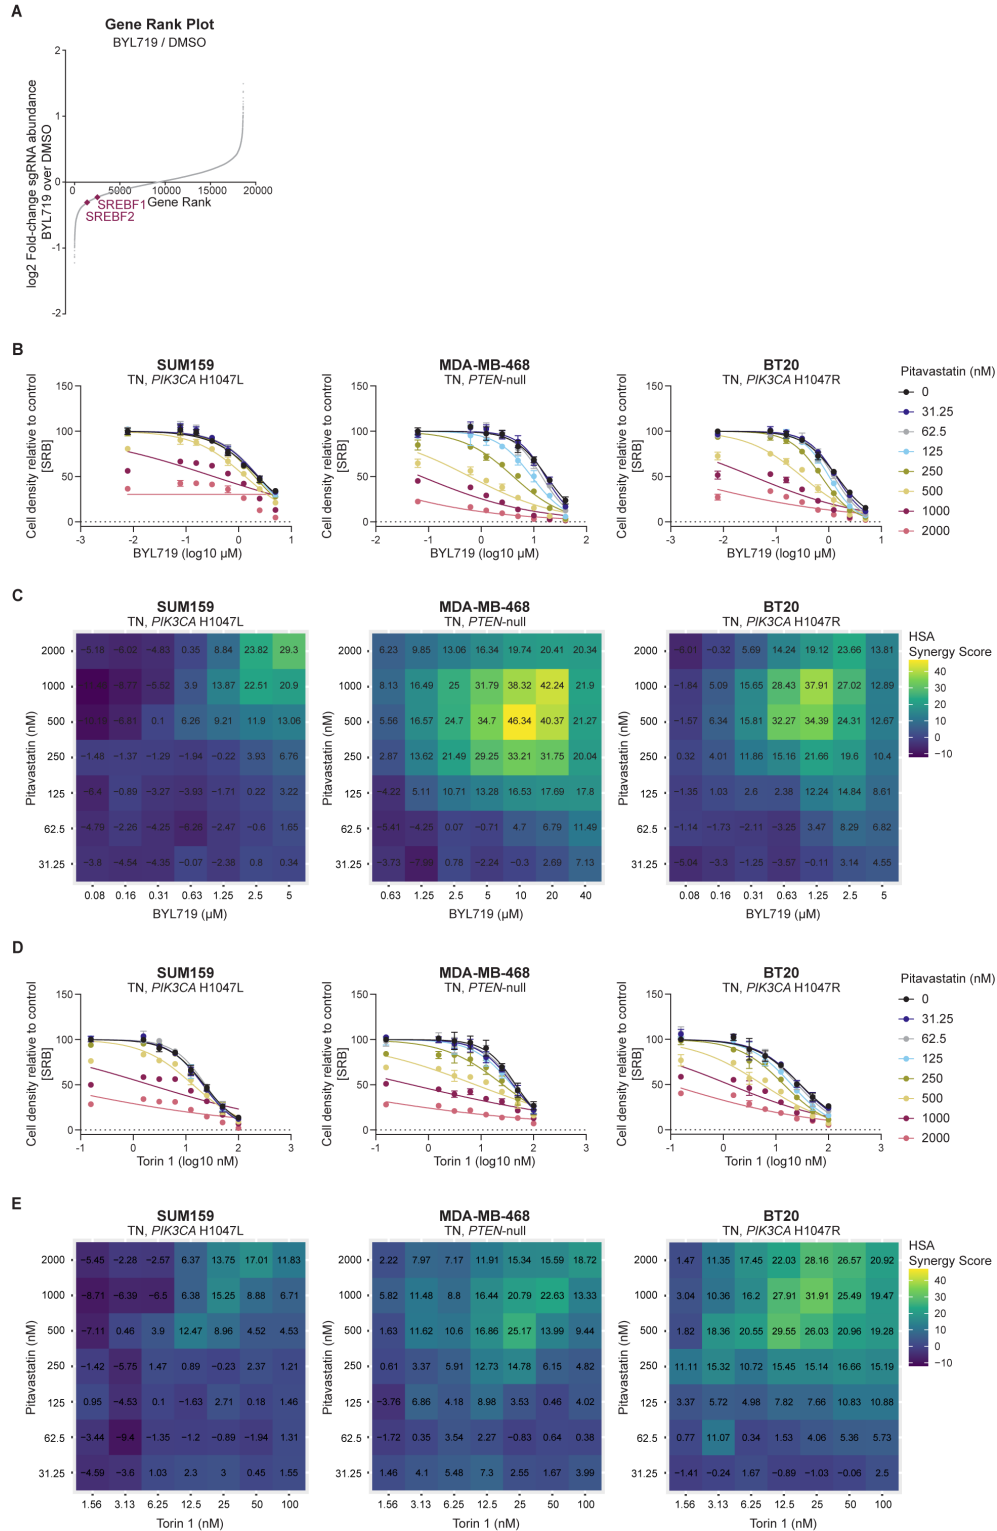

44 **Supplementary Figure S4. Pitavastatin synergizes with the PI3K $\alpha$  inhibitor BYL719 and the**  
 45 **mTORC1/2 inhibitor Torin 1 in TNBC cells. A, Rank plots showing the log<sub>2</sub> fold-change of each gene**  
 46 **plotted against the rank dropout for the BYL719 treatment arm of the CRISPR/Cas9 screen compared to**

47 the DMSO arm. The transcription factors *SREBF1* and *SREBF2* are highlighted. The plot was generated  
48 using MAGeCK with a read count cutoff of 50 (N=3 technical replicates). **B**, TNBC cell lines (SUM159,  
49 MDA-MB-468, BT20) were treated with increasing doses of BYL719 (SUM159: 0-5  $\mu$ M, MDA-MB-468: 0-  
50 40  $\mu$ M, BT20: 0-5  $\mu$ M) and pitavastatin (0-2000 nM) for 72 hours, and cell density was measured by SRB  
51 assay. Data are represented as mean  $\pm$  SD (N=3 technical replicates). **C**, HSA synergy scores were  
52 calculated for the dose curves shown in **B** using SynergyFinder and are reported in the heatmaps (N=3  
53 technical replicates). **D**, TNBC cell lines (SUM159, MDA-MB-468, BT20) were treated with increasing  
54 doses of Torin 1 (0-100 nM) and pitavastatin (0-2000 nM) for 72 hours, and cell density was measured by  
55 SRB assay. Data are represented as mean  $\pm$  SD (N=2 technical replicates). **E**, HSA synergy scores were  
56 calculated for the dose curves shown in **D** using SynergyFinder and are reported in the heatmaps (N=2  
57 technical replicates).

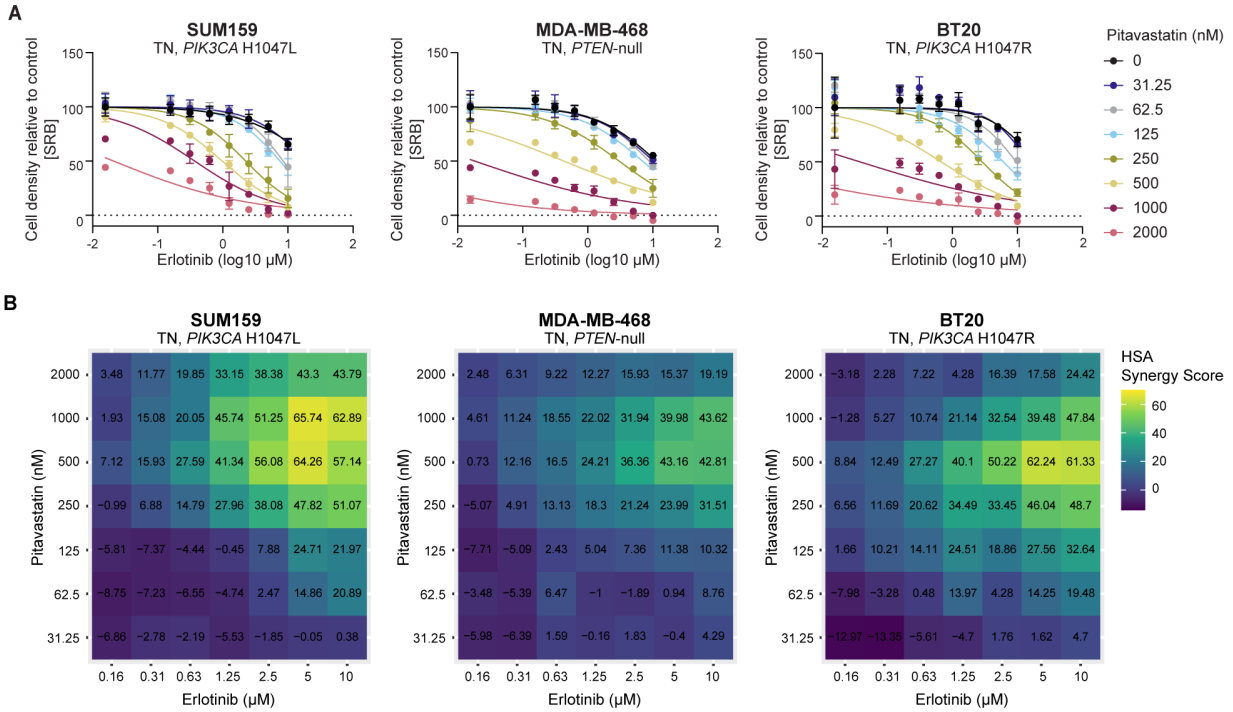

58 **Supplementary Figure S5. Pitavastatin synergizes with the EGFR inhibitor erlotinib in TNBC cells.**

59 **A**, TNBC cell lines (SUM159, MDA-MB-468, BT20) were treated with increasing doses of erlotinib (0-10

60  $\mu\text{M}$ ) and pitavastatin (0-2000 nM) for 72 hours, and cell density was measured by SRB assay. Data are

61 represented as mean  $\pm$  SD (N=2 technical replicates). **B**, HSA synergy scores were calculated for the

62 dose curves shown in **A** using SynergyFinder and are reported in the heatmaps (N=2 technical

63 replicates).

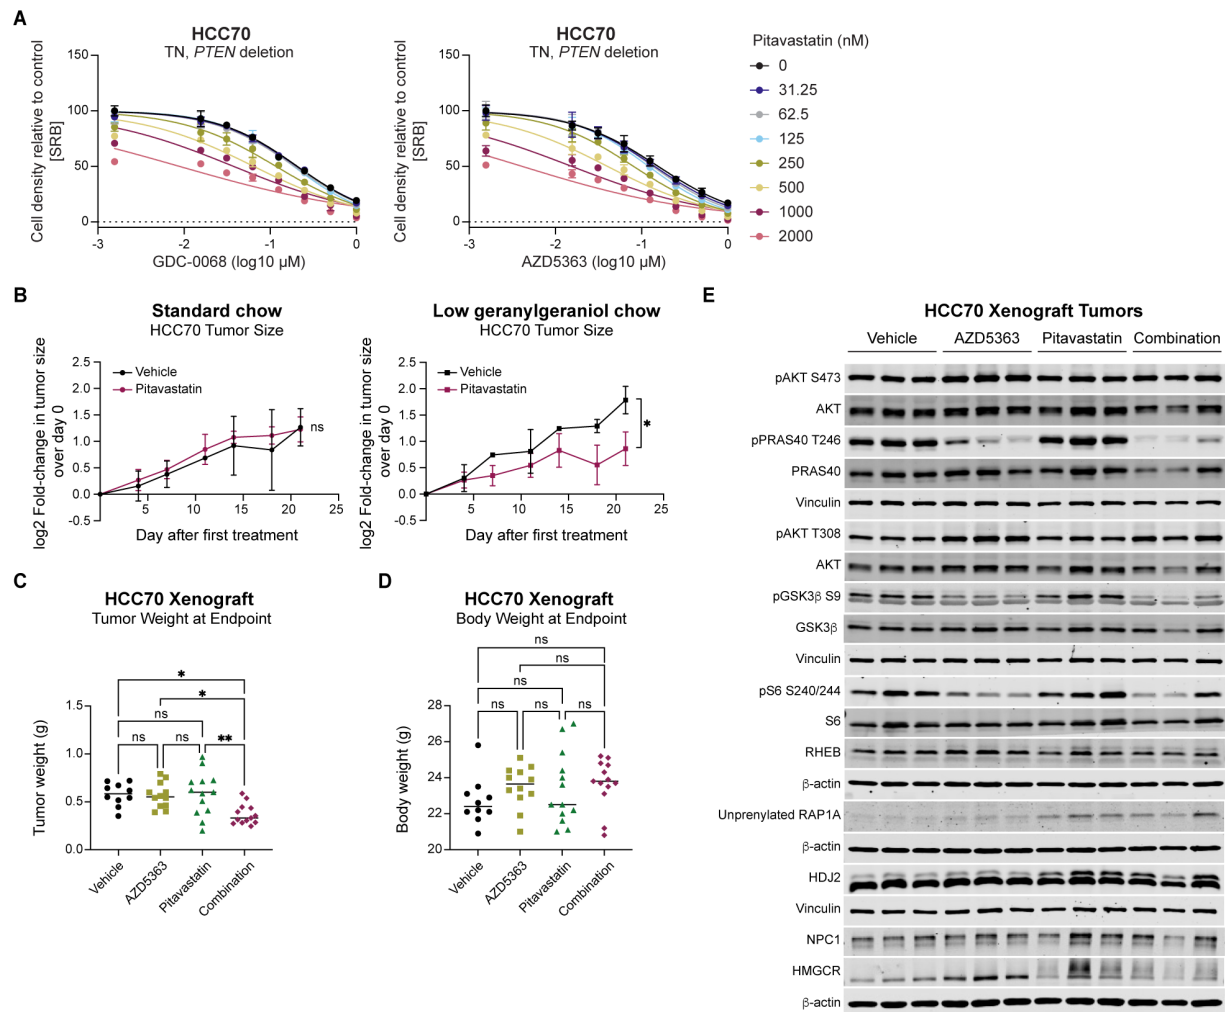

64 **Supplementary Figure S6. AZD5363 and pitavastatin synergize in HCC70 cells *in vitro* and in**  
 65 **mouse xenografts with on-target efficacy. A**, HCC70 cells were treated with increasing doses of GDC-  
 66 0068 (0-1 μM) or AZD5363 (0-1 μM) and pitavastatin (0-2000 nM) for 72 hours, and cell density was  
 67 measured by SRB assay. Data are represented as mean ± SD (N=3 technical replicates). **B**, In a pilot  
 68 experiment, HCC70 cells were injected subcutaneously into NSG mice and tumors were allowed to grow  
 69 for 21 days before starting treatments. Mice were maintained on a standard chow diet or switched to a  
 70 low geranylgeraniol chow diet 3 days before starting treatments and were treated once daily with vehicle  
 71 (0.5% carboxymethylcellulose, N=2 per diet) or 100 mg/kg pitavastatin (daily, N=3 per diet) for 20 days.  
 72 Tumor size (mm<sup>3</sup>) was measured every 3-4 days. Statistical analysis was performed using an unpaired,  
 73 two-tailed parametric t-test (\*, p = 0.0332). **C-E** represent data from the mouse experiment in **Fig. 3B-D**.  
 74 **C**, Tumor weight was measured at the endpoint. **D**, Mouse body weight was measured at the endpoint.

75 For **C-D**, statistical analysis was performed using two-way analysis of variance (ANOVA) with Tukey's  
76 multiple comparison test; asterisks (\*) indicate significant differences compared to the AZD5363 and  
77 pitavastatin combination treatment at the endpoint (\*,  $p = 0.0332$ , \*\*,  $p = 0.0021$ ). **E**, Select tumors (3 per  
78 treatment group) were harvested 2 hours after the last AZD5363 treatment and 6 hours after the last  
79 pitavastatin treatment and immunoblotted for pAKT<sup>Ser473</sup>, pPRAS40<sup>Thr246</sup>, pAKT<sup>Thr308</sup>, pGSK3 $\beta$ <sup>Ser9</sup>,  
80 pS6<sup>Ser240/244</sup>, RHEB, unphosphorylated RAP1A, HDJ2, NPC1, HMGCR, vinculin and  $\beta$ -actin.

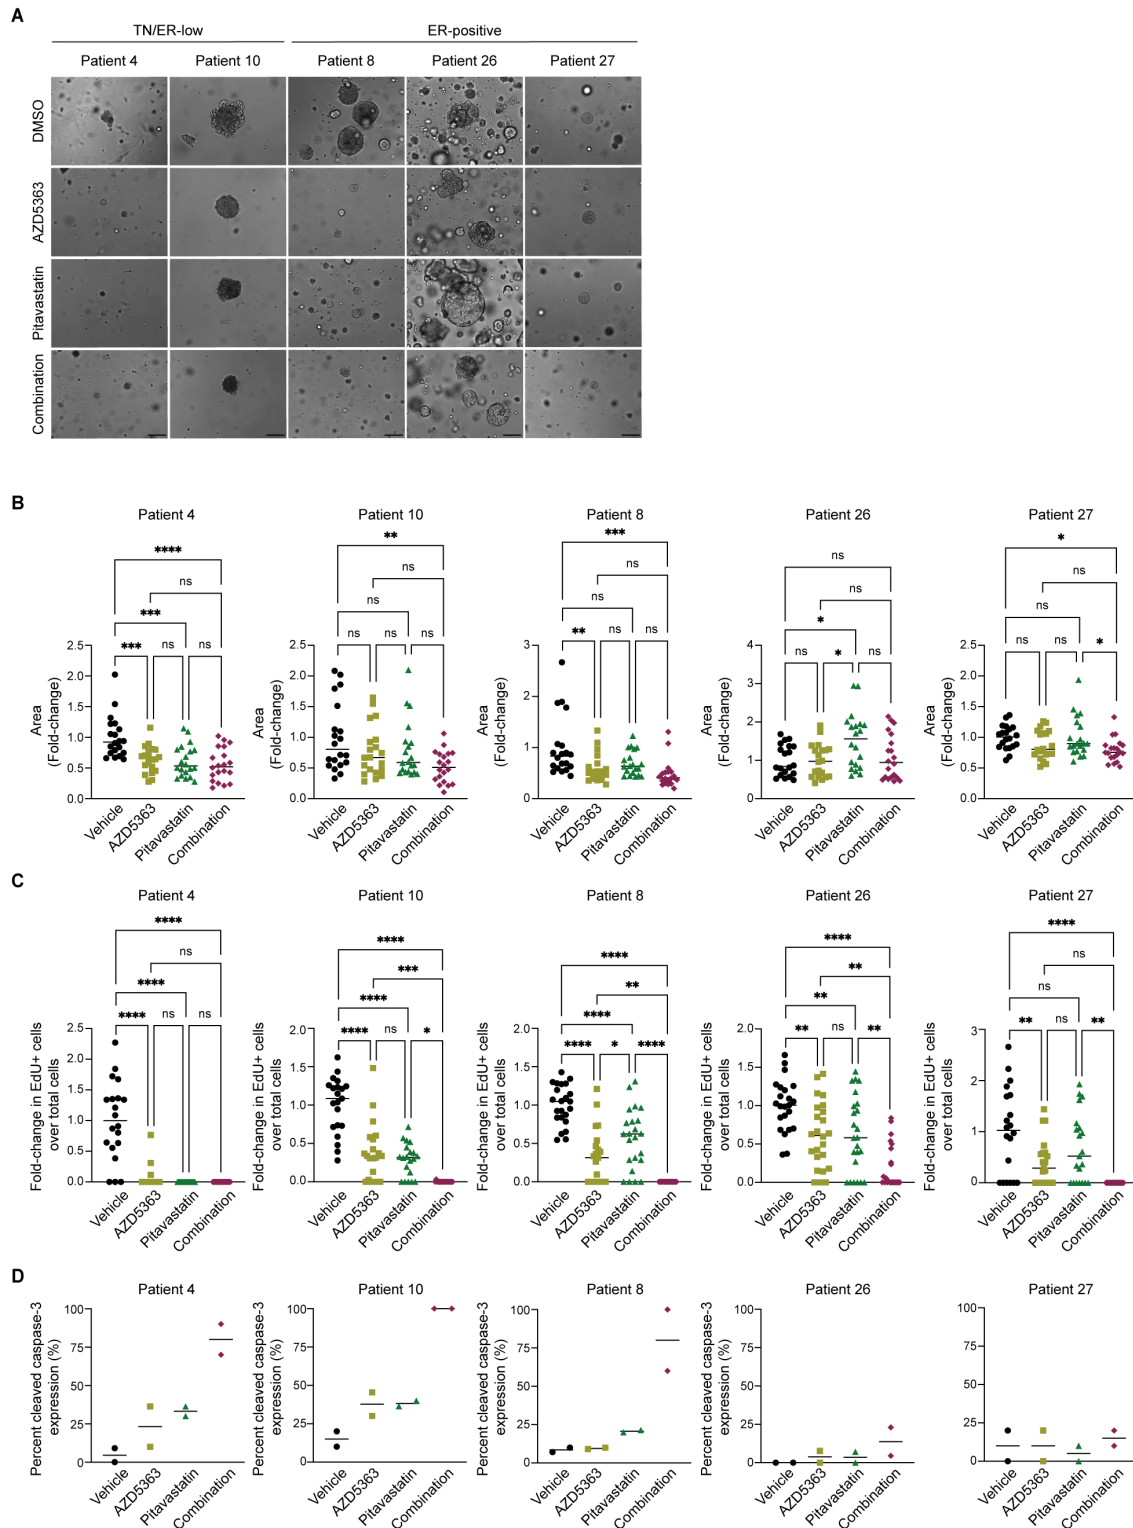

81 **Supplementary Figure S7. TN/ER-low PDOs are sensitive to combination AZD5363 and**  
 82 **pitavastatin. A,** A panel of breast cancer PDOs were treated with DMSO, 1  $\mu$ M AZD5363, 5  $\mu$ M  
 83 pitavastatin or the combination of AZD5363 and pitavastatin for 96 hours and organoid size and



84 morphology were assessed. A representative image for each PDO in each treatment condition is shown.  
85 Scale bars are 200  $\mu\text{m}$ . **B**, The area of 20 PDOs per treatment condition was quantified and normalized to  
86 the vehicle-treated condition. **C**, EdU+ cells were quantified for 20 PDOs per treatment condition and  
87 normalized to total cell number and to the vehicle-treated condition. For **B-C**, statistical analysis was  
88 performed using two-way analysis of variance (ANOVA) with Tukey's multiple comparison test; asterisks  
89 (\*) indicate significant differences (\*,  $p = 0.0332$ , \*\*,  $p = 0.0021$ , \*\*\*,  $p = 0.0002$ , \*\*\*\*,  $p < 0.0001$ ). **D**, The  
90 percentage of cleaved caspase-3-expressing PDOs was quantified for 2 images per treatment condition.

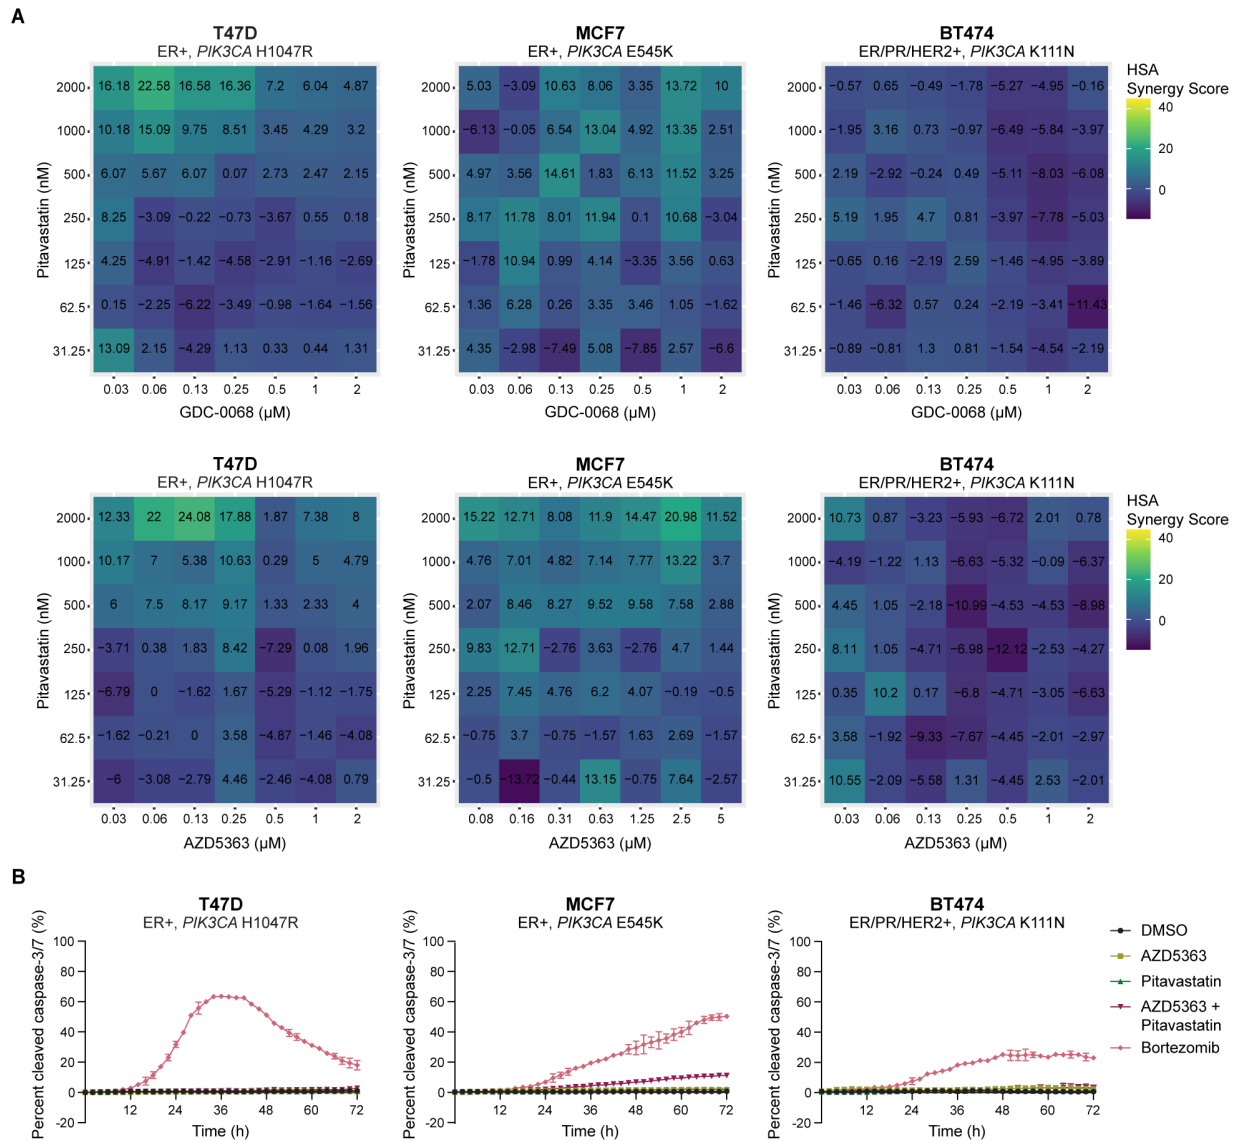

91 **Supplementary Figure S8. Pitavastatin does not synergize with AKT inhibition to induce cell death**  
 92 **in ER-positive breast cancer cells. A**, ER-positive breast cancer cell lines (T47D, MCF7, BT474) were  
 93 treated with increasing doses of GDC-0068 (0-2  $\mu$ M) or AZD5363 (T47D: 0-2  $\mu$ M, MCF7: 0-5  $\mu$ M, BT474:  
 94 0-2  $\mu$ M) and pitavastatin (0-2000 nM) for 72 hours, and cell density was measured by SRB assay. HSA  
 95 synergy scores were calculated using SynergyFinder and are reported in the heatmaps (N=3 technical  
 96 replicates). **B**, ER-positive breast cancer cell lines were treated with DMSO, AZD5363 (T47D: 0.25  $\mu$ M,  
 97 MCF7: 1.25  $\mu$ M, BT474: 0.25  $\mu$ M), pitavastatin (2  $\mu$ M), a combination of AZD5363 and pitavastatin or  
 98 bortezomib (10  $\mu$ M) for 72 hours, and total cell number (rapid red nuclear dye) and number of dead cells

99 (cleaved caspase-3/7 dye) were measured every 2 hours for 72 hours by Incucyte live-cell analysis. Data  
100 are represented as mean  $\pm$  SD of percent cleaved caspase-3/7 signal (N=4 technical replicates).

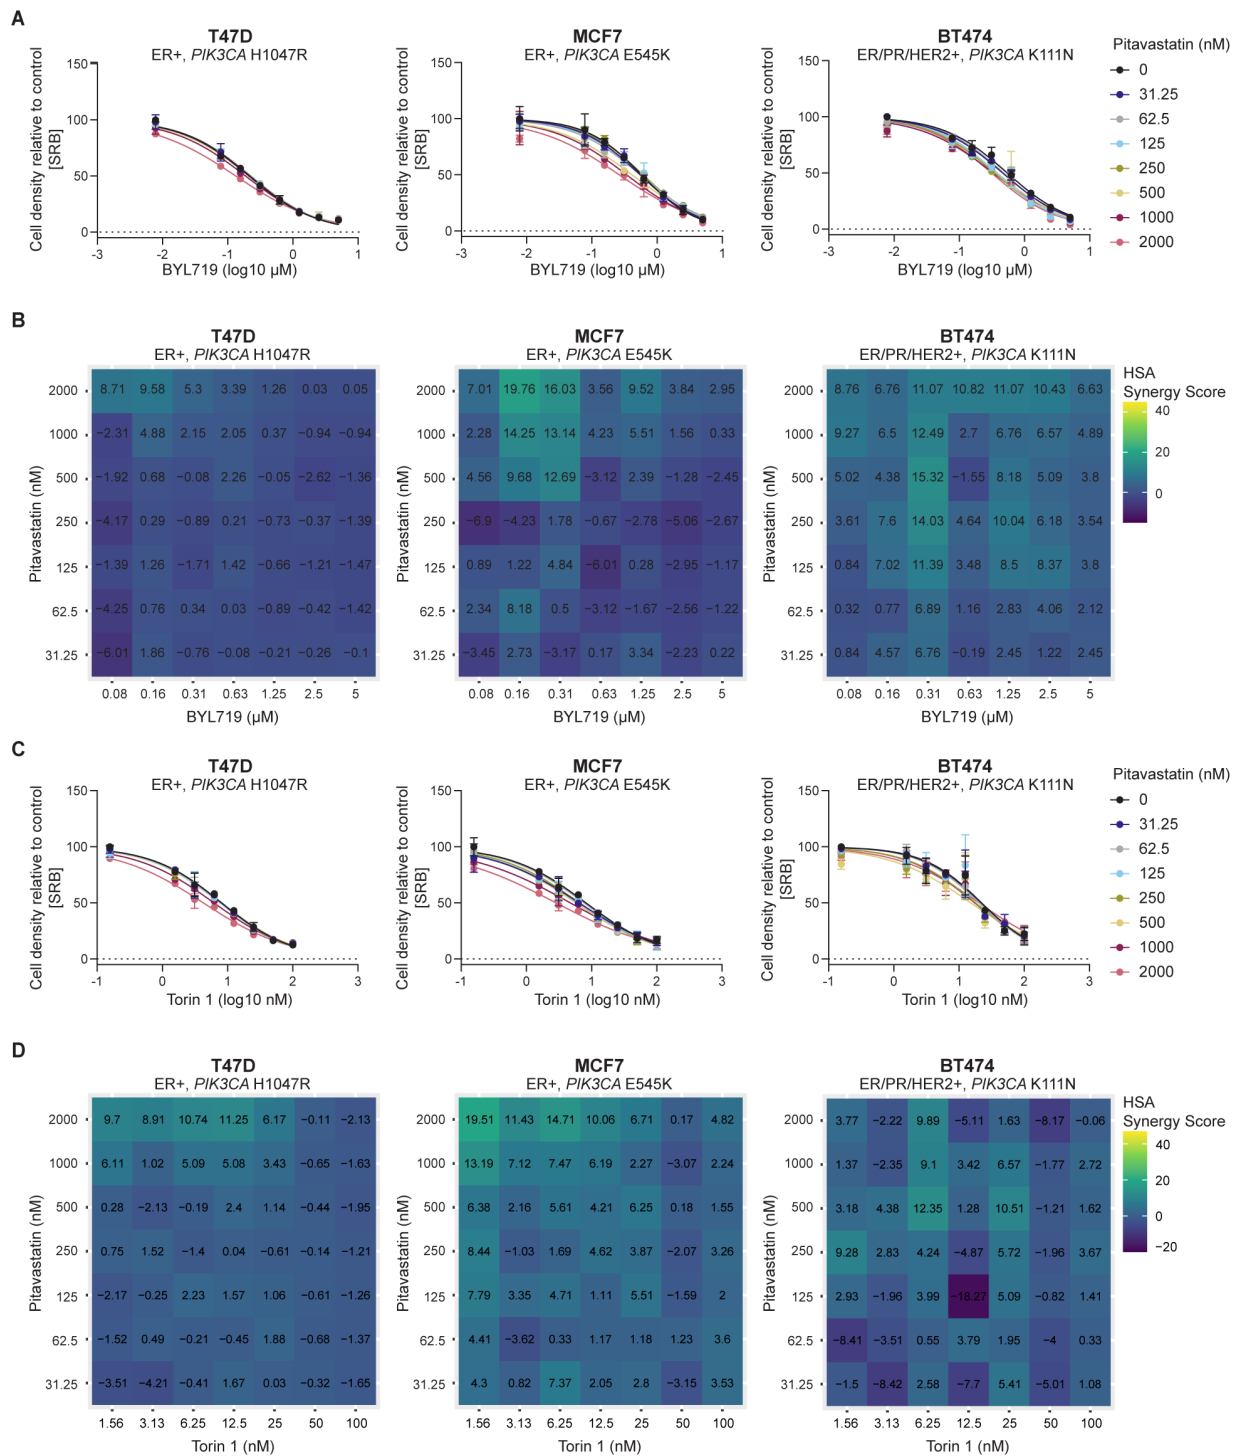

101 **Supplementary Figure S9. Pitavastatin does not synergize with the PI3K $\alpha$  inhibitor BYL719 or the**  
 102 **mTORC1/2 inhibitor Torin 1 in ER-positive breast cancer cells. A, ER-positive breast cancer cell lines**  
 103 **(T47D, MCF7, BT474) were treated with increasing doses of BYL719 (0-5  $\mu$ M) and pitavastatin (0-2000**  
 104 **nM) for 72 hours, and cell density was measured by SRB assay. Data are represented as mean  $\pm$  SD**

105 (N=3 technical replicates). **B**, HSA synergy scores were calculated for the dose curves shown in **a** using  
106 SynergyFinder and are reported in the heatmaps (N=3 technical replicates). **C**, ER-positive breast cancer  
107 cell lines (T47D, MCF7, BT474) were treated with increasing doses of Torin 1 (0-100 nM) and pitavastatin  
108 (0-2000 nM) for 72 hours, and cell density was measured by SRB assay. Data are represented as mean  $\pm$   
109 SD (N=2 technical replicates). **D**, HSA synergy scores were calculated for the dose curves shown in **C**  
110 using SynergyFinder and are reported in the heatmaps (N=2 technical replicates).

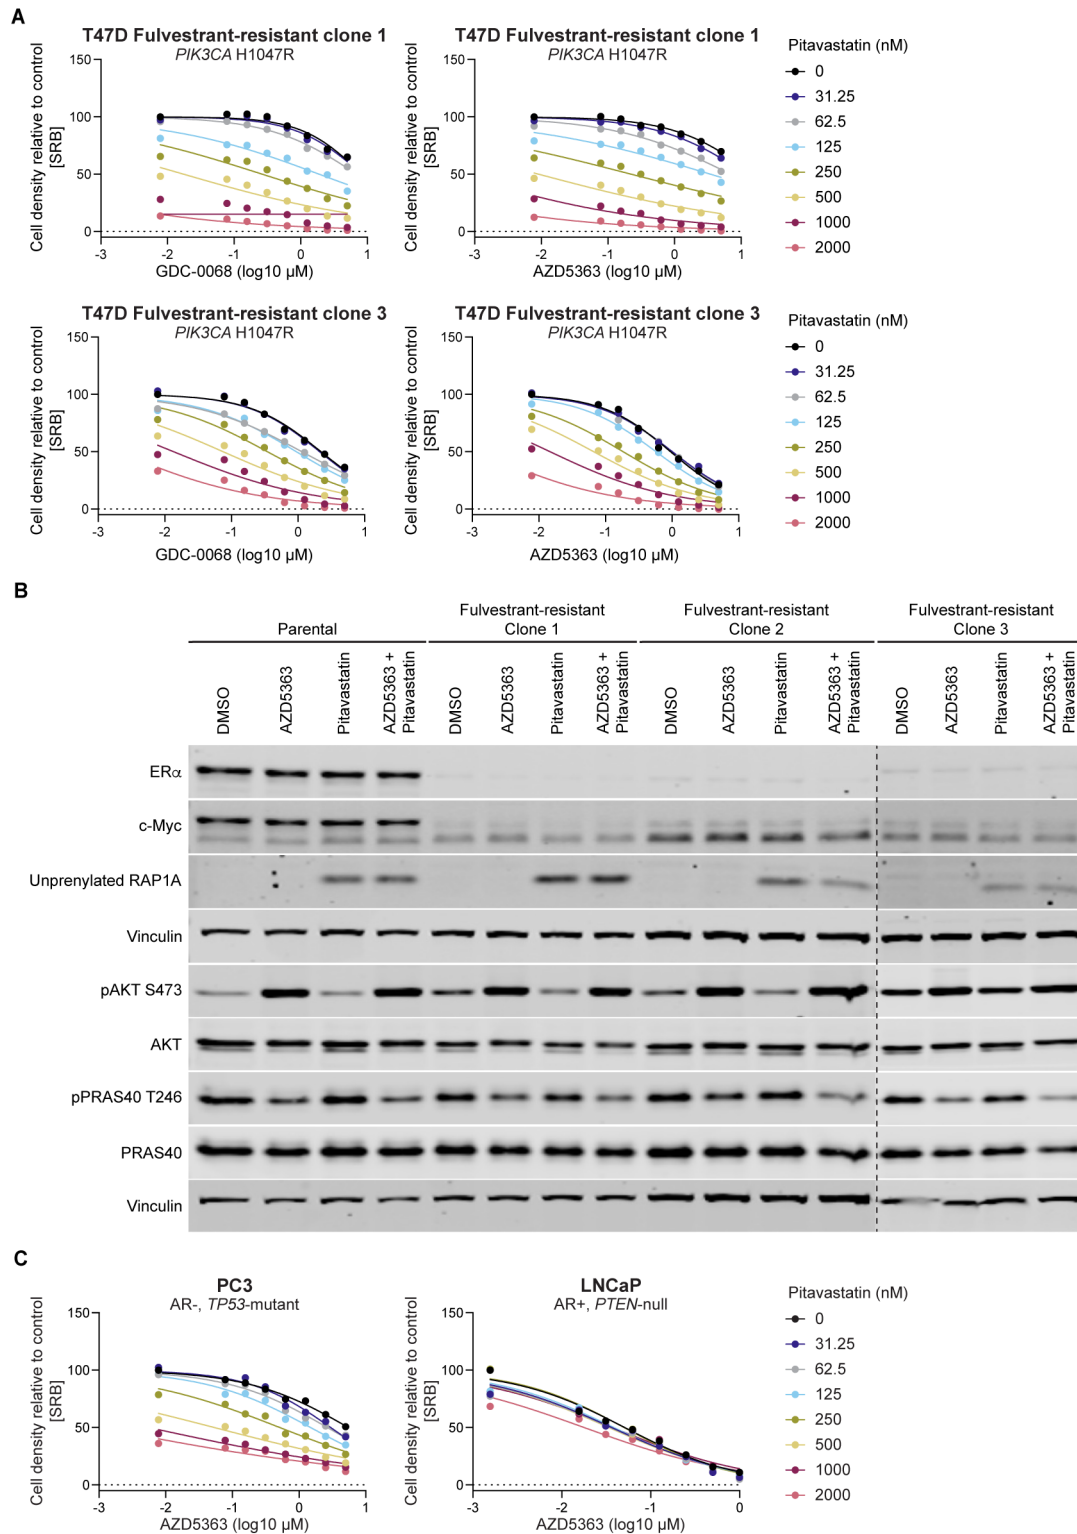

111 **Supplementary Figure S10. Pitavastatin synergizes with AKT inhibition in fulvestrant-resistant**  
 112 **T47D cells. A,** Parental and fulvestrant-resistant T47D cells were treated with increasing doses of GDC-  
 113 0068 (0-5 μM) or AZD5363 (0-5 μM) and pitavastatin (0-2000 nM) for 72 hours, and cell density was

114 measured by SRB assay (N=1 technical replicate). **B**, Immunoblots of ER $\alpha$ , c-Myc, unphosphorylated RAP1A,  
115 vinculin, pAKT<sup>Ser473</sup> and pPRAS40<sup>Thr246</sup> in parental and fulvestrant-resistant T47D cells treated with  
116 DMSO, AZD5363 (0.25  $\mu$ M), pitavastatin (0.5  $\mu$ M) or the combination of AZD5363 and pitavastatin for 72  
117 hours. Fulvestrant-resistant clone 3 samples were run on a separate gel. **C**, AR-negative (PC3) and AR-  
118 positive (LNCaP) prostate cancer cells were treated with increasing doses of AZD5363 (PC3: 0-5  $\mu$ M,  
119 LNCaP: 0-1  $\mu$ M) and pitavastatin (0-2000 nM) for 72 hours, and cell density was measured by SRB assay  
120 (N=1 technical replicate).

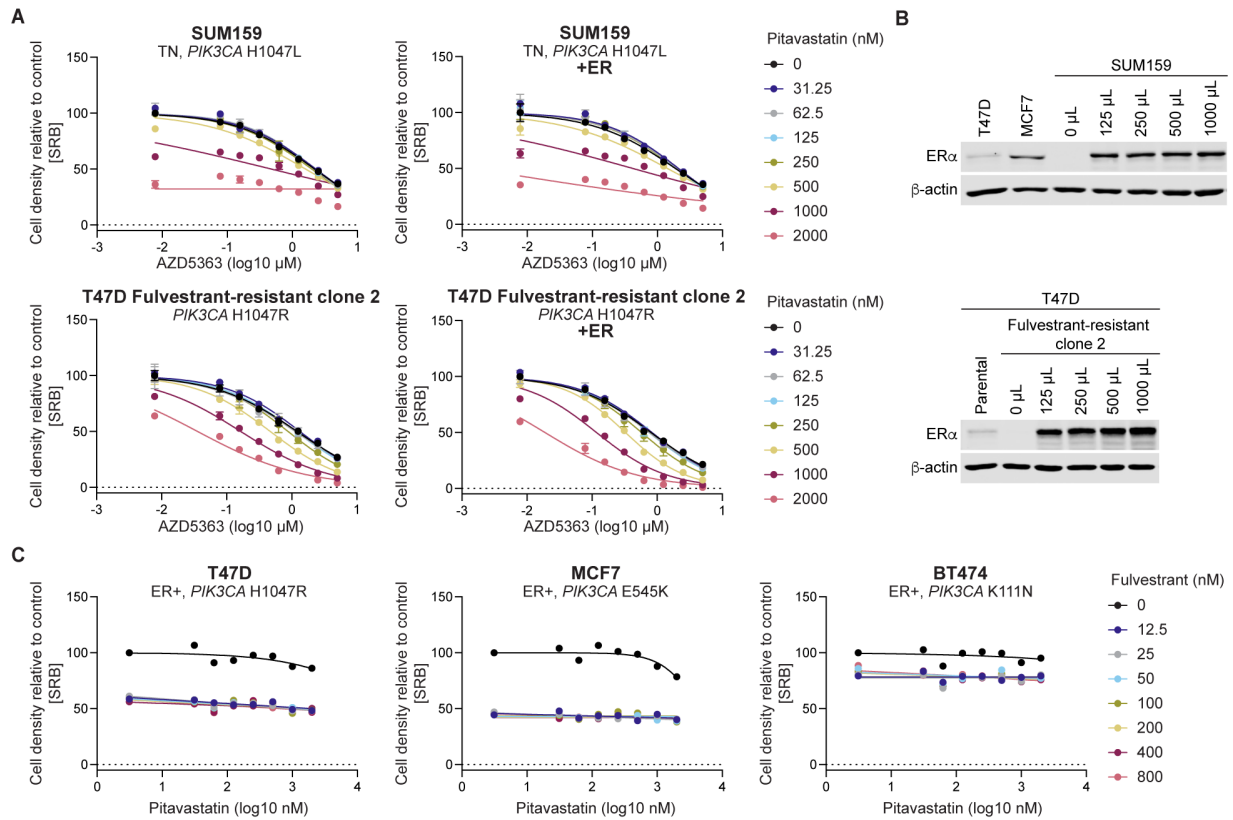

121 **Supplementary Figure S11. Modulation of ER expression does not affect pitavastatin sensitivity. A,**  
 122 ER-negative breast cancer cell lines (SUM159, fulvestrant-resistant T47D clone 2) were transduced with  
 123 lentiviral vectors to overexpress estrogen receptor (ER) and were maintained in culture for approximately  
 124 1 week. Parental and ER-overexpressing cells were then treated with increasing doses of AZD5363 (0-5  
 125 μM) and pitavastatin (0-2000 nM) for 72 hours, and cell density was measured by SRB assay. Data are  
 126 represented as mean ± SD (N=2 technical replicates). **B,** Immunoblots of ERα and β-actin in SUM159  
 127 and fulvestrant-resistant T47D cells overexpressing ER with pHAGE-ESR1 compared to ER-positive  
 128 breast cancer cell lines (T47D, MCF7) and parental T47D cells. **C,** ER-positive breast cancer cell lines  
 129 (T47D, MCF7, BT474) were treated with increasing doses of fulvestrant (0-800 nM) and pitavastatin (0-  
 130 2000 nM) for 72 hours, and cell density was measured by SRB assay. Data represent a single technical  
 131 replicate (N=1 technical replicate).



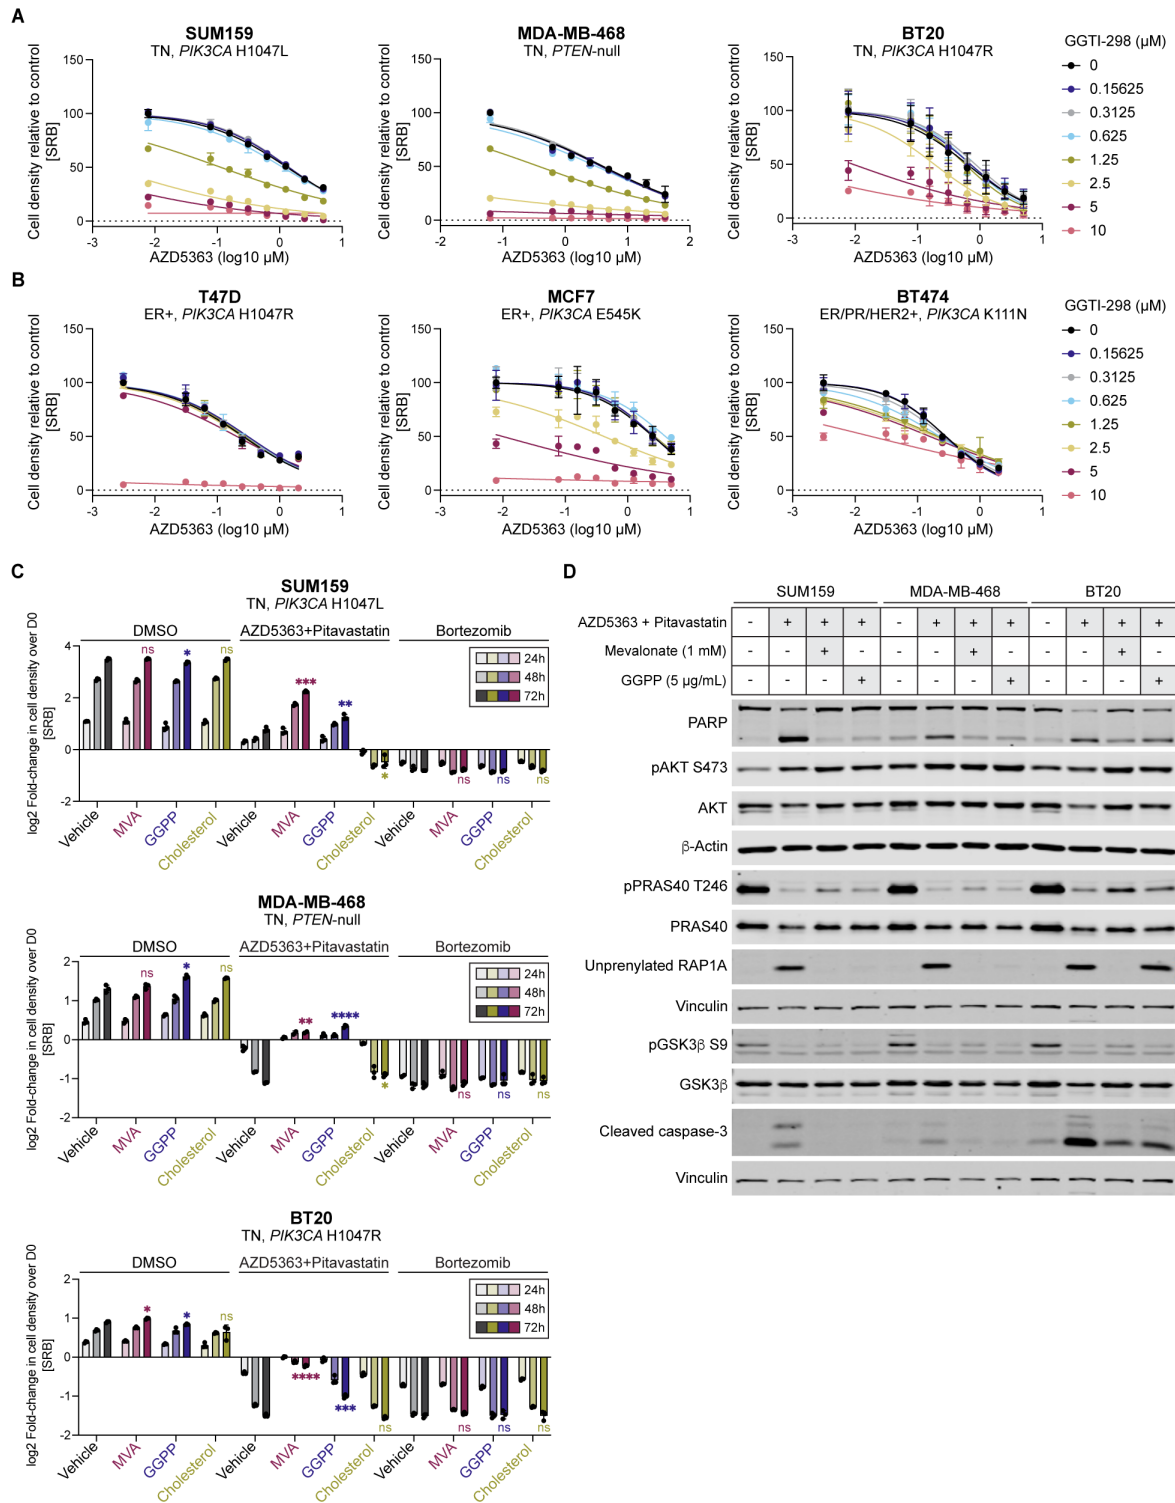

132 **Supplementary Figure S12. AKT inhibitors synergize with cholesterol biosynthesis inhibition to**  
 133 **deplete GGPP. A,** TNBC cell lines (SUM159, MDA-MB-468, BT20) were treated with increasing doses of  
 134 AZD5363 (SUM159: 0-5  $\mu$ M, MDA-MB-468: 0-40  $\mu$ M, BT20: 0-5  $\mu$ M) and GGTI-298 (0-10  $\mu$ M) for 72

135 hours, and cell density was measured by SRB assay. Data are represented as mean  $\pm$  SD (N=2 technical  
136 replicates). **B**, ER-positive breast cancer cell lines (T47D, MCF7, BT474) were treated with increasing  
137 doses of AZD5363 (T47D: 0-2  $\mu$ M, MCF7: 0-5  $\mu$ M, BT474: 0-2  $\mu$ M) and GGTI-298 (0-10  $\mu$ M) for 72 hours,  
138 and cell density was measured by SRB assay. Data are represented as mean  $\pm$  SD (N=2 technical  
139 replicates). **C**, TNBC cell lines (SUM159, MDA-MB-468, BT20) were treated with DMSO, a combination of  
140 AZD5363 (SUM159: 5  $\mu$ M, MDA-MB-468: 15  $\mu$ M, BT20: 1.25  $\mu$ M) and pitavastatin (SUM159: 4  $\mu$ M, MDA-  
141 MB-468: 2  $\mu$ M, BT20: 2  $\mu$ M) or bortezomib (10  $\mu$ M) and supplemented with vehicle (7:3 MeOH:NH<sub>4</sub>OH),  
142 mevalonate (1 mM), GGPP (5  $\mu$ g/mL) or cholesterol (5  $\mu$ g/mL) for 24, 48 or 72 hours. Cell density was  
143 measured by SRB assay at each time point. Data are represented as mean  $\pm$  SD (N=3 technical  
144 replicates). Statistical analysis was performed for the 72-hour time point using two-way analysis of  
145 variance (ANOVA) with Dunnett's multiple comparison test; asterisks (\*) indicate significant differences  
146 compared to the 72-hour vehicle supplemented condition within the DMSO, AZD5363 and pitavastatin or  
147 bortezomib treatment group (\*, p = 0.0332, \*\*, p = 0.0021, \*\*\*, p = 0.0002, \*\*\*\*, p < 0.0001). **D**,  
148 Immunoblots of PARP, pAKT<sup>Ser473</sup>, pPRAS40<sup>Thr246</sup>, unphosphorylated RAP1A, pGSK3 $\beta$ <sup>Ser9</sup>, cleaved caspase-  
149 3,  $\beta$ -actin and vinculin in TNBC cell lines (SUM159, MDA-MB-468, BT20) treated with DMSO or a  
150 combination of AZD5363 (SUM159: 5  $\mu$ M, MDA-MB-468: 15  $\mu$ M, BT20: 1.25  $\mu$ M) and pitavastatin  
151 (SUM159: 4  $\mu$ M, MDA-MB-468: 2  $\mu$ M, BT20: 2  $\mu$ M) and supplemented with vehicle (7:3 MeOH:NH<sub>4</sub>OH),  
152 mevalonate (1 mM), GGPP (5  $\mu$ g/mL) or cholesterol (5  $\mu$ g/mL) for 22 hours.

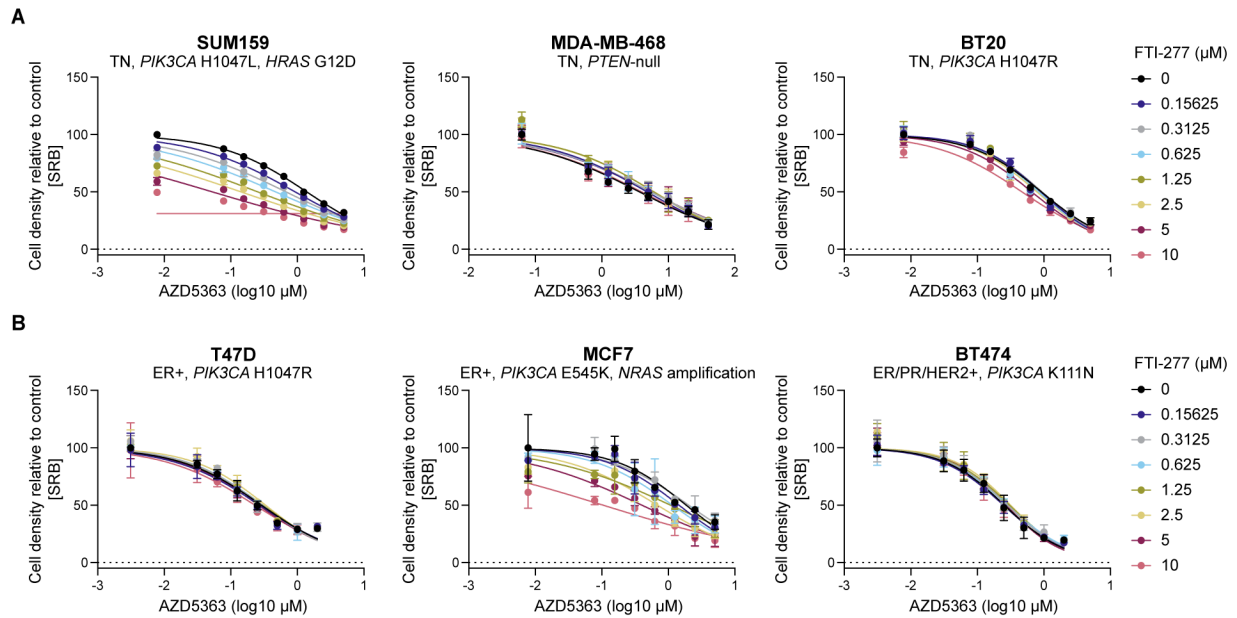

153 **Supplementary Figure S13. Farnesyltransferase inhibition with FTI-277 synergizes with AZD5363**  
 154 **in *RAS*-altered breast cancer cells. A,** TNBC cell lines (SUM159, MDA-MB-468, BT20) were treated  
 155 with increasing doses of AZD5363 (SUM159: 0-5  $\mu$ M, MDA-MB-468: 0-40  $\mu$ M, BT20: 0-5  $\mu$ M) and FTI-  
 156 277 (0-10  $\mu$ M) for 72 hours, and cell density was measured by SRB assay. Data are represented as mean  
 157  $\pm$  SD (N=2 technical replicates). **B,** ER-positive breast cancer cell lines (T47D, MCF7, BT474) were  
 158 treated with increasing doses of AZD5363 (T47D: 0-2  $\mu$ M, MCF7: 0-5  $\mu$ M, BT474: 0-2  $\mu$ M) and FTI-277  
 159 (0-10  $\mu$ M) for 72 hours, and cell density was measured by SRB assay. Data are represented as mean  $\pm$   
 160 SD (N=2 technical replicates).

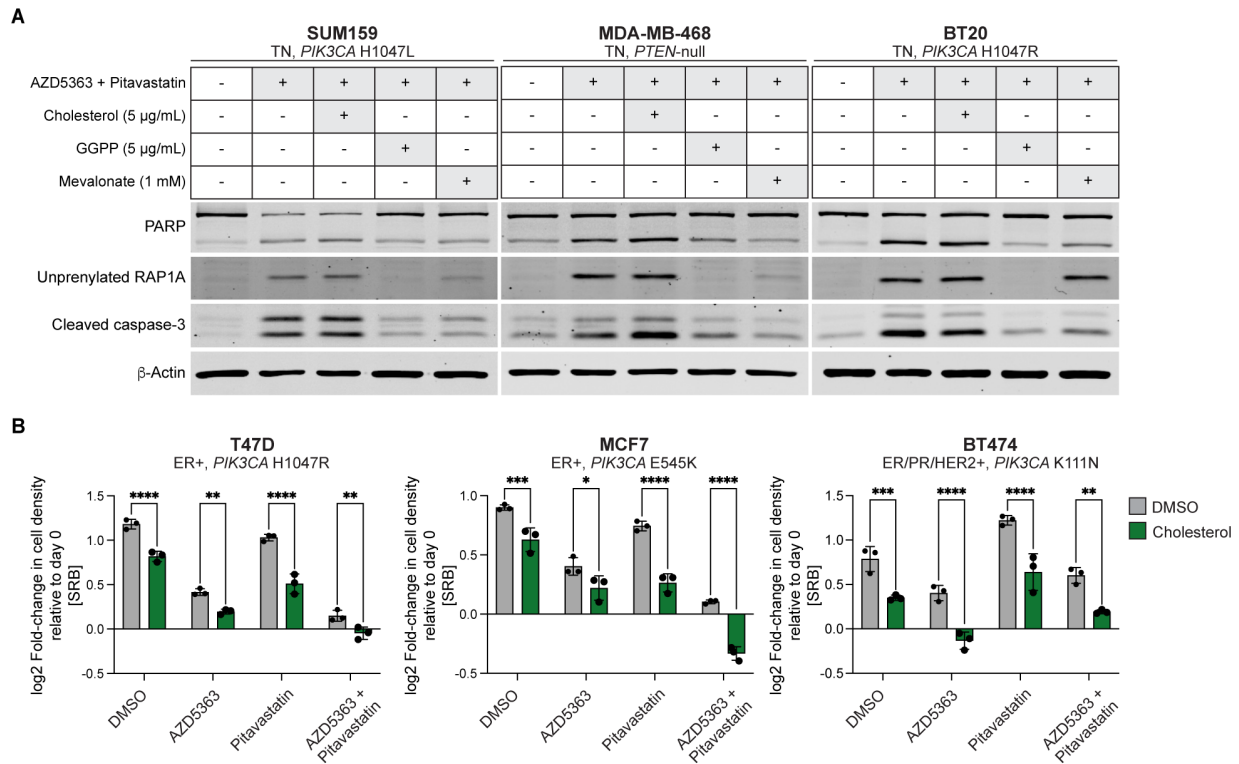

161 **Supplementary Figure S14. Cholesterol supplementation potentiates the cytotoxicity of AZD5363**

162 **and pitavastatin in TN and ER+ breast cancer cells. A, Immunoblots of PARP, unphosphorylated RAP1A,**

163 **cleaved caspase-3 and  $\beta$ -actin in TNBC cell lines (SUM159, MDA-MB-468, BT20) treated with DMSO or a**

164 **combination of AZD5363 (SUM159: 5  $\mu$ M, MDA-MB-468: 15  $\mu$ M, BT20: 1.25  $\mu$ M) and pitavastatin**

165 **(SUM159: 4  $\mu$ M, MDA-MB-468: 2  $\mu$ M, BT20: 2  $\mu$ M) and supplemented with vehicle (7:3 MeOH:NH<sub>4</sub>OH),**

166 **cholesterol (5  $\mu$ g/mL), GGPP (5  $\mu$ g/mL) or mevalonate (1 mM) for 22 hours. B, ER-positive breast cancer**

167 **cell lines (T47D, MCF7, BT474) were treated with DMSO, AZD5363 (T47D: 0.25  $\mu$ M, MCF7: 1.25  $\mu$ M,**

168 **BT474: 0.25  $\mu$ M), pitavastatin (2  $\mu$ M) or a combination of AZD5363 and pitavastatin for 72 hours and**

169 **supplemented with DMSO or 5  $\mu$ g/mL cholesterol. Cell density was measured by SRB assay. Data are**

170 **represented as mean  $\pm$  SD (N=3 technical replicates). Statistical analysis was performed using two-way**

171 **analysis of variance (ANOVA) with Šidák's multiple comparison test; asterisks (\*) indicate significant**

172 **differences between the mean of DMSO-supplemented cells and the mean of cholesterol-supplemented**

173 **cells for each treatment (\*, p = 0.0332, \*\*, p = 0.0021, \*\*\*, p = 0.0002, \*\*\*\*, p < 0.0001).**

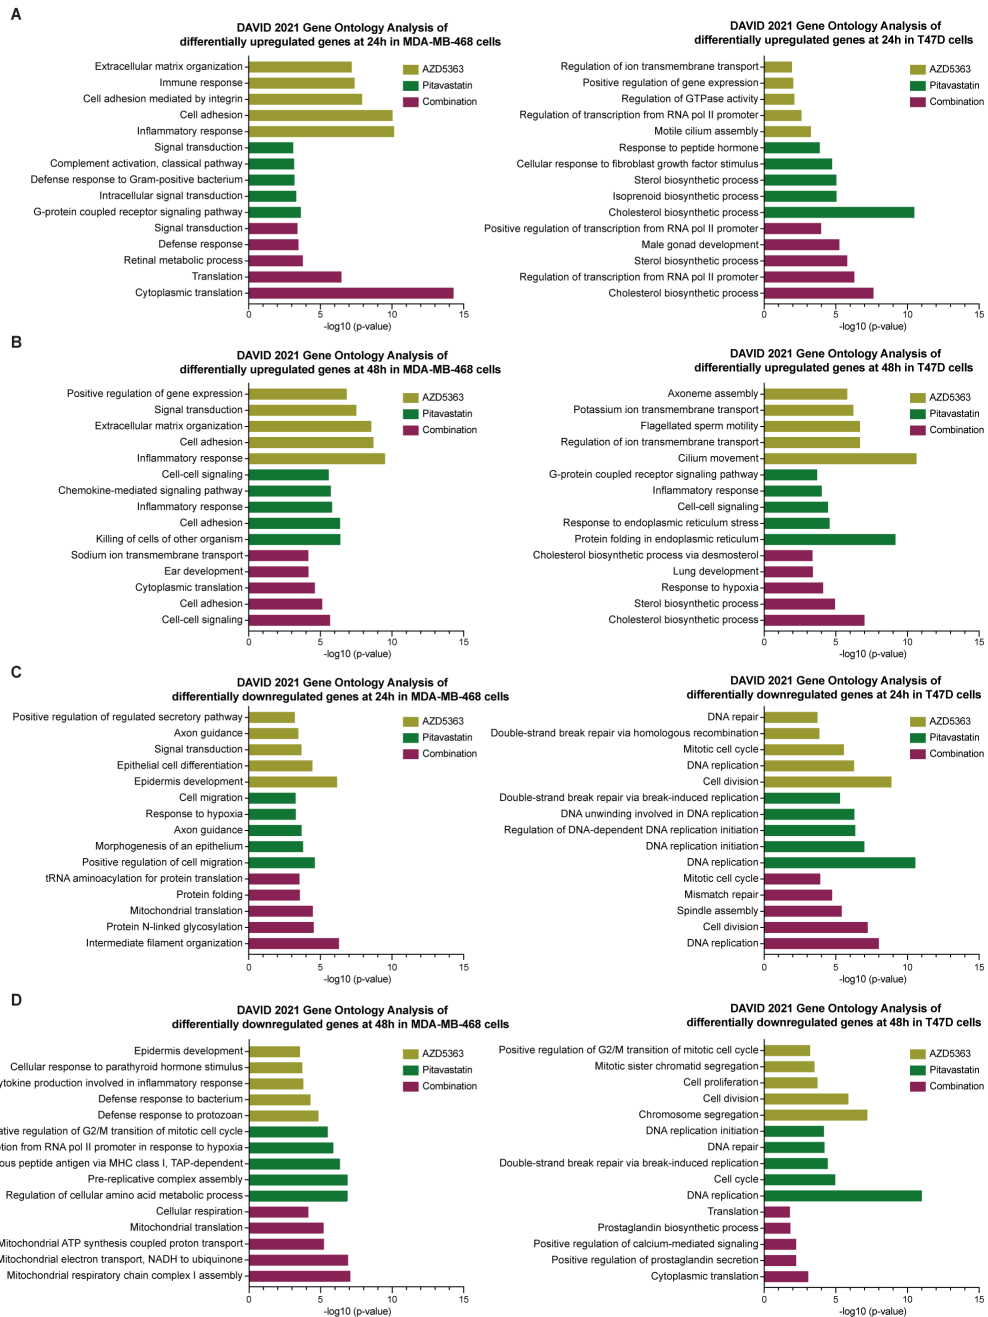

174 **Supplementary Figure S15. Cholesterol biosynthesis is uniquely upregulated after pitavastatin**  
 175 **treatment in ER+ breast cancer cells. A-D, DAVID 2021 gene ontology analysis of differentially**  
 176 **regulated genes after AZD5363, pitavastatin or combination treatment for 24 or 48 hours in MDA-MB-468**  
 177 **and T47D cells from RNA-sequencing data. Pathways are plotted against the  $-\log_{10}(p\text{-value})$ . A,**  
 178 **Pathways enriched in uniquely upregulated genes in MDA-MB-468 and T47D cells at 24 hours. B,**  
 179 **Pathways enriched in uniquely upregulated genes in MDA-MB-468 and T47D cells at 48 hours. C,**

- 180 Pathways enriched in uniquely downregulated genes in MDA-MB-468 and T47D cells at 24 hours. **D**,
- 181 Pathways enriched in uniquely downregulated genes in MDA-MB-468 and T47D cells at 48 hours.

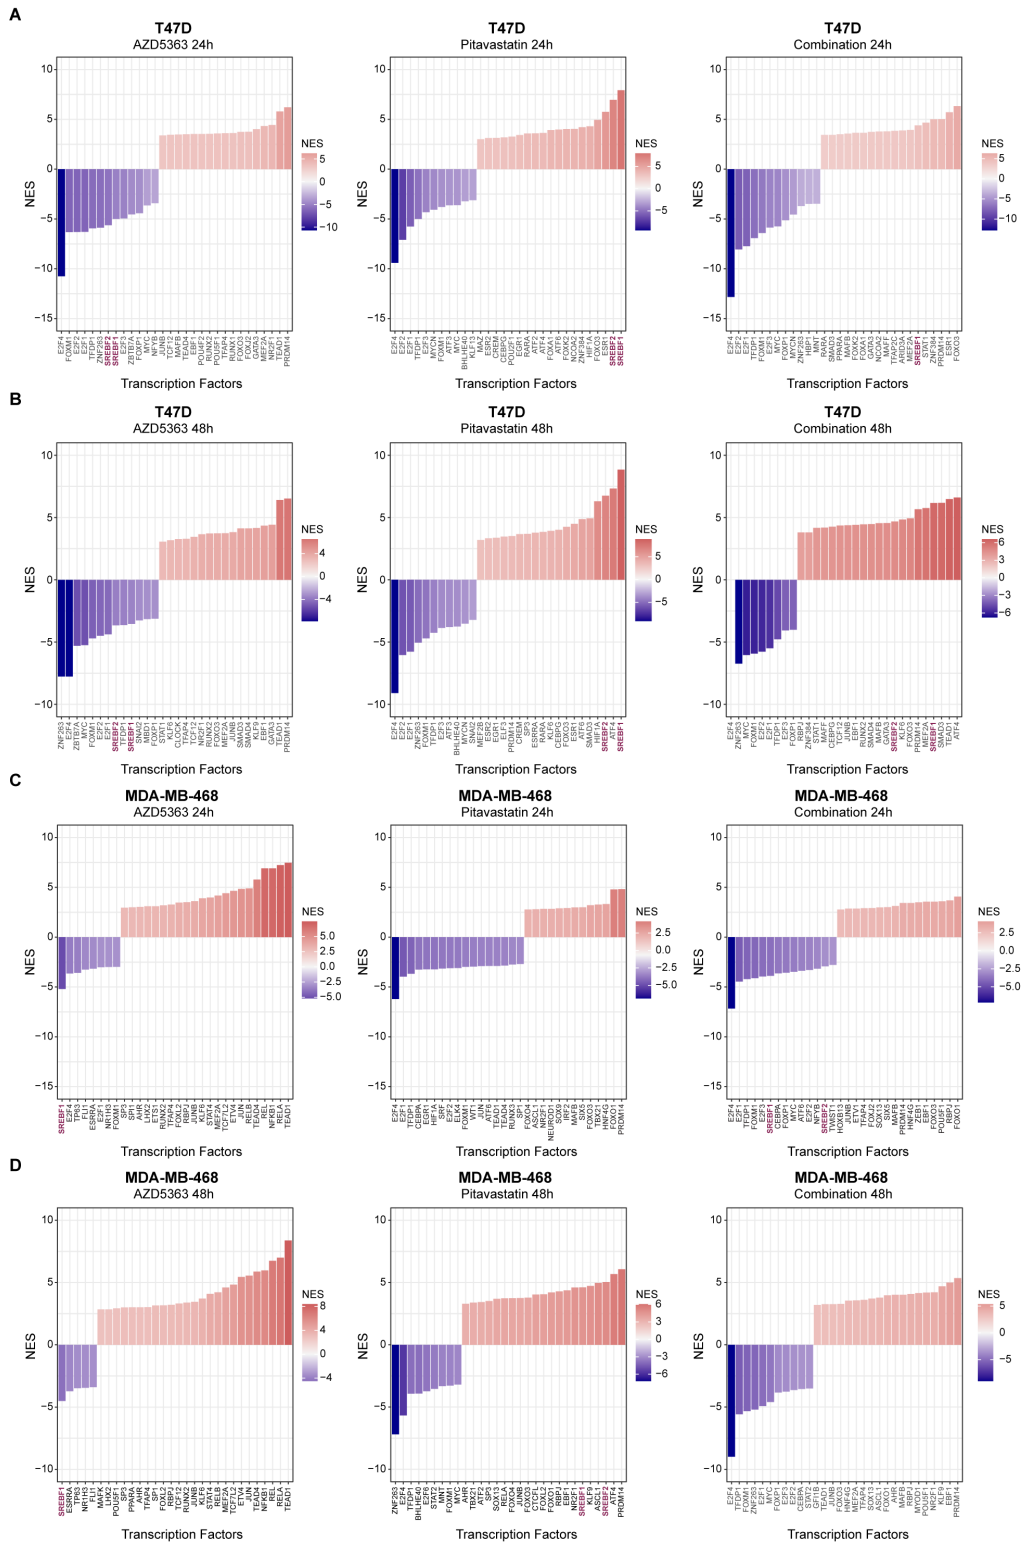

182 **Supplementary Figure S16. The predicted transcription factor activities of *SREBF1* and *SREBF2***  
 183 **are uniquely upregulated after AZD5363 and pitavastatin treatment in ER+ breast cancer cells. A-**  
 184 **D, DoRoThEA transcription factor activity prediction of RNA sequencing data in T47D cells after 24 (A) or**

185 48 hours (**B**) of treatment and in MDA-MB-468 cells after 24 (**C**) or 48 hours (**D**) of treatment. Normalized  
186 enrichment scores (NES) are plotted for transcription factors with activity that is predicted to be  
187 significantly altered by drug treatment. *SREBF1* and *SREBF2* are highlighted.



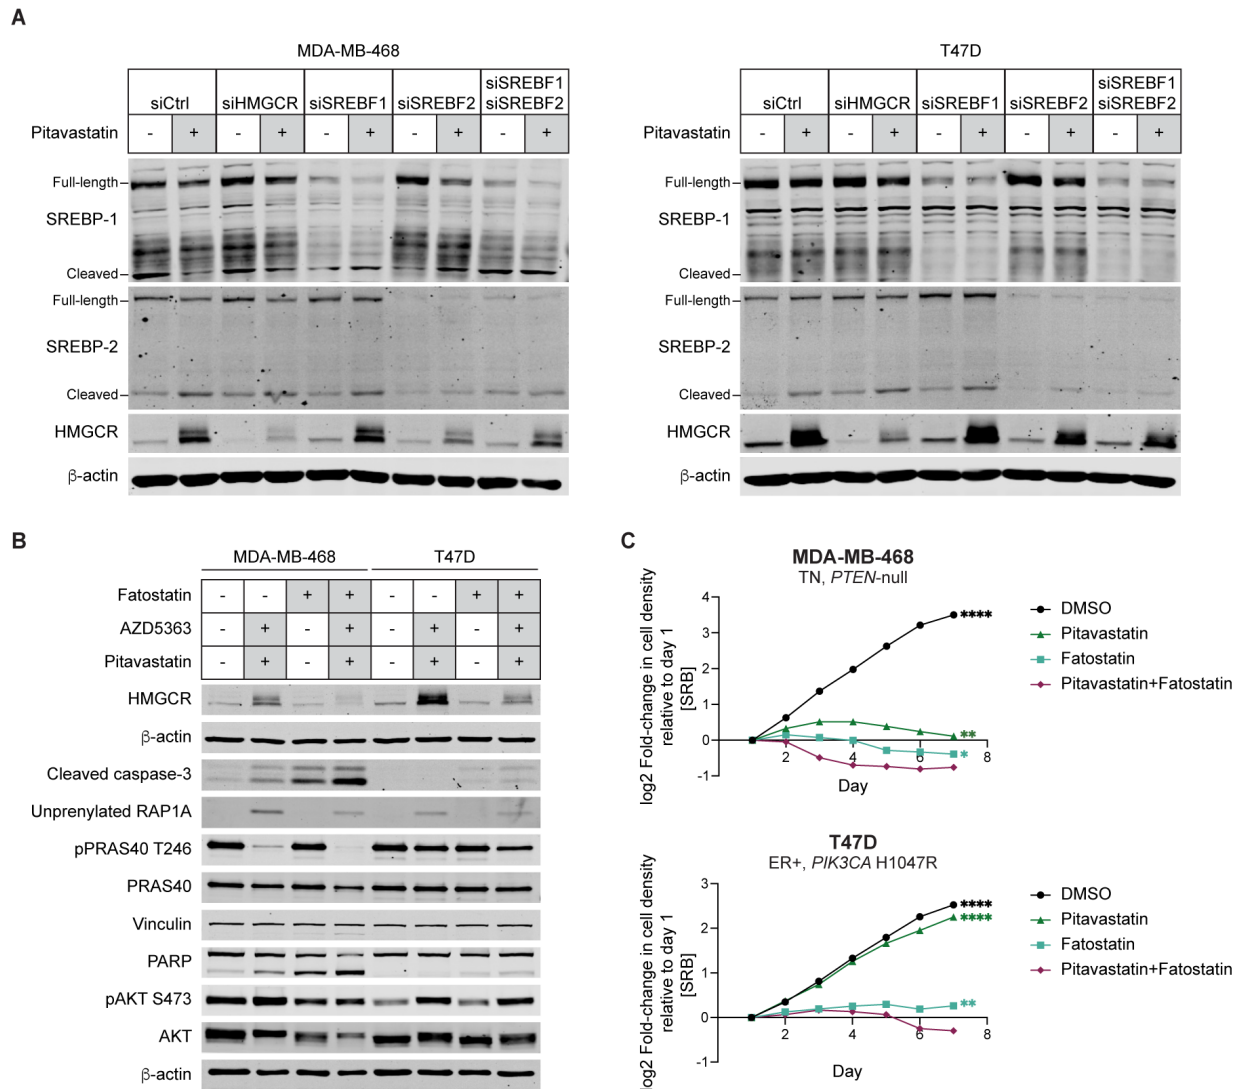

188 **Supplementary Figure S17. *SREBF2* depletion or inhibition sensitizes breast cancer cells to**  
 189 **pitavastatin by limiting *HMGCR* upregulation. A**, Immunoblots of *SREBP-1*, *SREBP-2*, *HMGCR* and  $\beta$ -  
 190 actin in MDA-MB-468 and T47D cells with siRNA knockdown of control (Ctrl), *HMGCR*, *SREBF1*,  
 191 *SREBF2* or both *SREBF1* and *SREBF2* and treatment with DMSO or 2  $\mu$ M pitavastatin for 24 hours. **B**,  
 192 Immunoblots of *HMGCR*, cleaved caspase-3, unprenylated RAP1A, pPRAS40<sup>Thr246</sup>, PARP, pAKT<sup>Ser473</sup>  
 193 and  $\beta$ -actin in MDA-MB-468 and T47D cells treated with DMSO or 10  $\mu$ M fatostatin for 24 hours, followed  
 194 by treatment with AZD5363 (MDA-MB-468: 15  $\mu$ M, T47D: 0.25  $\mu$ M) and 2  $\mu$ M pitavastatin for 24 hours. **C**,  
 195 MDA-MB-468 and T47D cells were pre-treated with DMSO or 10  $\mu$ M fatostatin for 2 hours, followed by  
 196 treatment with DMSO or 2  $\mu$ M pitavastatin for 7 days, and cell density was measured daily by SRB assay.  
 197 Data are represented as mean  $\pm$  SD (N=3 technical replicates). Statistical analysis was performed using

198 two-way analysis of variance (ANOVA) with Dunnett's multiple comparison test; asterisks (\*) indicate  
199 significant differences compared to the pitavastatin and fatostatin combination treatment on day 7 (\*, p =  
200 0.0332, \*\*, p = 0.0021, \*\*\*, p = 0.0002, \*\*\*\*, p < 0.0001).

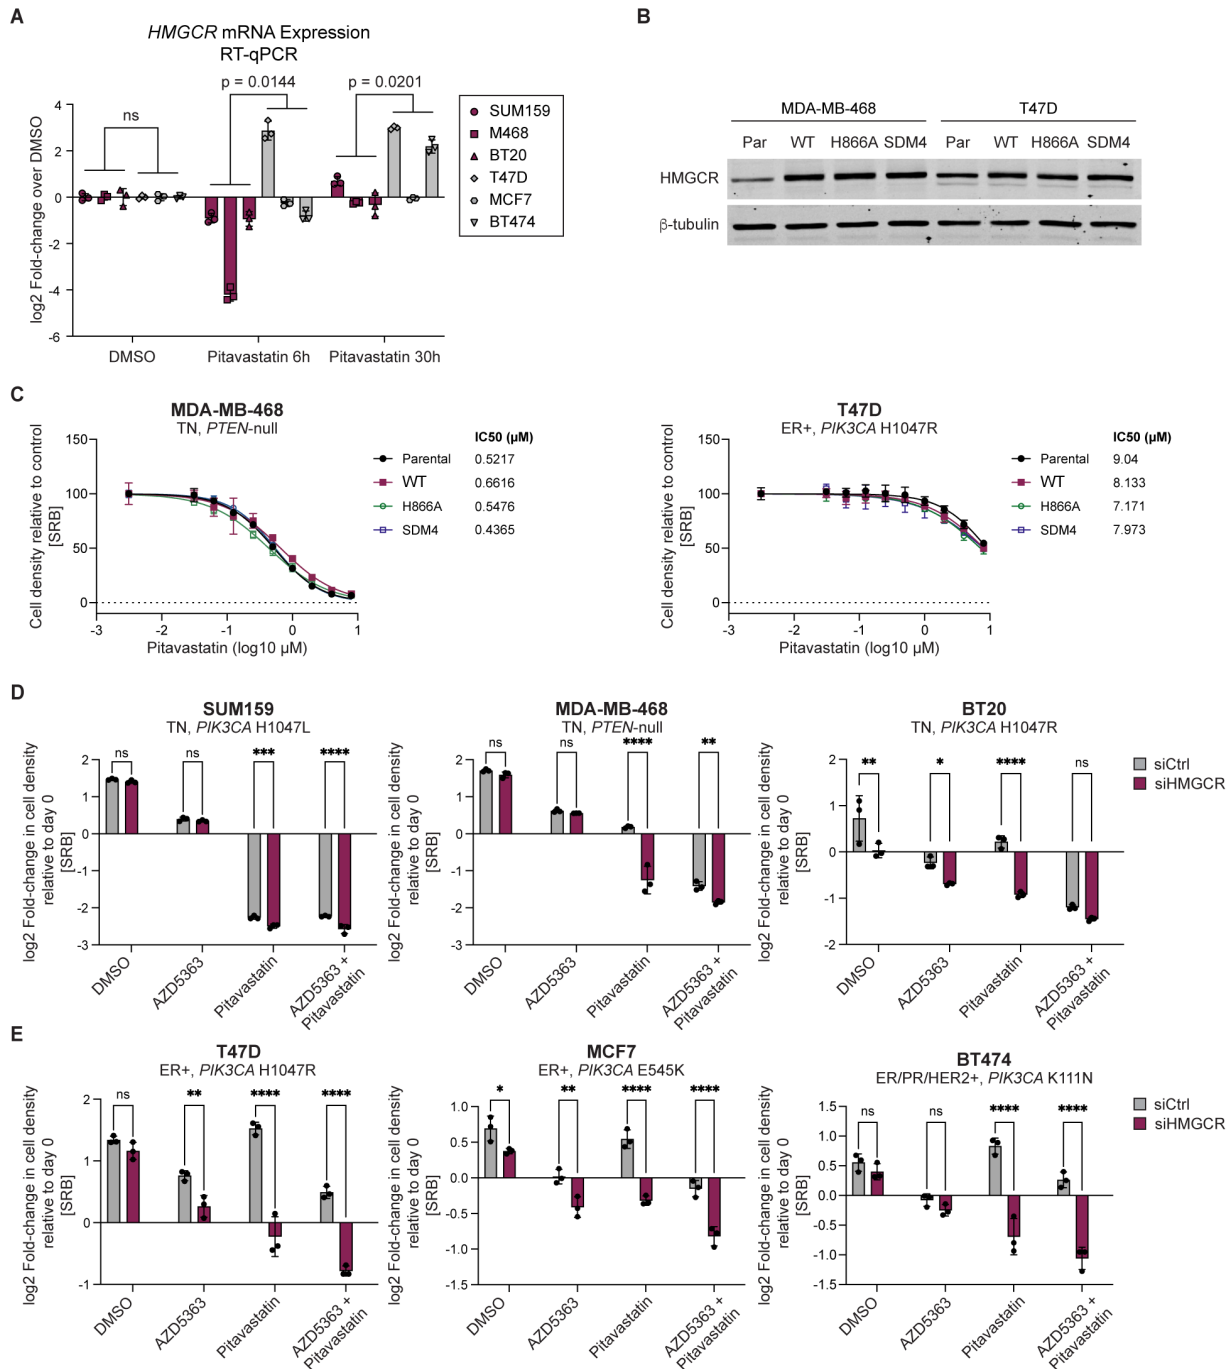

201 **Supplementary Figure S18. Depletion of HMGCR sensitizes ER+ breast cancer cells to pitavastatin**  
 202 **and combination AZD5363 and pitavastatin.** A, TN (SUM159, MDA-MB-468, BT20) and ER-positive  
 203 (T47D, MCF7, BT474) breast cancer cell lines were treated with DMSO or 2 μM pitavastatin for 6 or 30  
 204 hours, and *HMGCR* mRNA expression was measured by RT-qPCR. Data are represented as mean ± SD  
 205 (N=3 technical replicates). Statistical analysis was performed using two-way analysis of variance

206 (ANOVA) with Šidák's multiple comparison test. TNBC cell lines were compared to ER-positive breast  
207 cancer cell lines in each condition. **B**, Immunoblots of HMGCR and  $\beta$ -tubulin in parental and HMGCR-  
208 expressing MDA-MB-468 and T47D cells. Cells are expressing wild-type (WT), H866A or E559A, K691A,  
209 D767A and H866A pLenti6/V5-HMGCR. **C**, MDA-MB-468 and T47D cells expressing the pLenti6/V5-  
210 HMGCR constructs described in **B** were treated with a range of concentrations of pitavastatin (0-8  $\mu$ M) for  
211 72 hours, and cell density was measured by SRB assay. Data are represented as mean  $\pm$  SD (N=3  
212 technical replicates). **D**, TNBC cell lines (SUM159, MDA-MB-468, BT20) were transfected with siControl  
213 (siCtrl) or siHMGCR for 24 hours and then treated with DMSO, AZD5363 (SUM159: 5  $\mu$ M, MDA-MB-468:  
214 15  $\mu$ M, BT20: 1.25  $\mu$ M), pitavastatin (SUM159: 4  $\mu$ M, MDA-MB-468: 2  $\mu$ M, BT20: 2  $\mu$ M) or a combination  
215 of AZD5363 and pitavastatin for 72 hours, and cell density was measured by SRB assay. Data are  
216 represented as mean  $\pm$  SD (N=3 technical replicates). **E**, ER-positive breast cancer cell lines (T47D,  
217 MCF7, BT474) were transfected with siControl (siCtrl) or siHMGCR for 24 hours and then treated with  
218 DMSO, AZD5363 (T47D: 0.25  $\mu$ M, MCF7: 1.25  $\mu$ M, BT474: 0.25  $\mu$ M), pitavastatin (2  $\mu$ M) or a  
219 combination of AZD5363 and pitavastatin for 72 hours, and cell density was measured by SRB assay.  
220 Data are represented as mean  $\pm$  SD (N=3 technical replicates). For **D-E**, statistical analysis was  
221 performed using two-way analysis of variance (ANOVA) with Šidák's multiple comparison test to compare  
222 the mean of siCtrl cells to the mean of siHMGCR cells for each treatment (\*,  $p = 0.0332$ , \*\*,  $p = 0.0021$ ,  
223 \*\*\*,  $p = 0.0002$ , \*\*\*\*,  $p < 0.0001$ ).

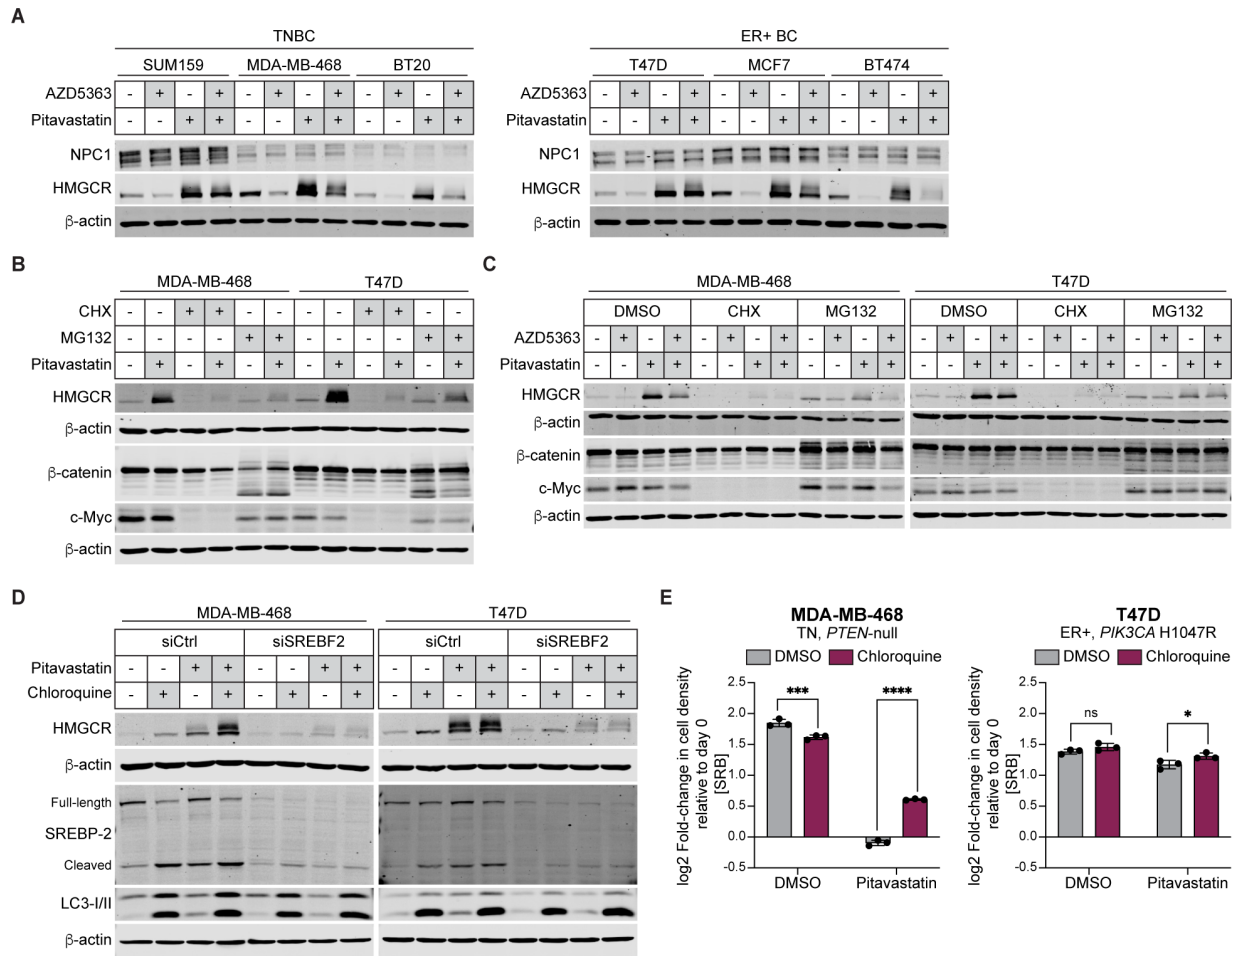

224 **Supplementary Figure S19. Pitavastatin-induced HMGCR upregulation is mediated by SREBP-2-**  
 225 **dependent new synthesis of HMGCR.** **A**, Immunoblots of NPC1, HMGCR and  $\beta$ -actin in a panel of TN  
 226 (SUM159, MDA-MB-468, BT20) and ER-positive (T47D, MCF7, BT474) breast cancer cells treated with  
 227 DMSO or a combination of AZD5363 (SUM159: 2.5  $\mu$ M, MDA-MB-468: 10  $\mu$ M, BT20: 1.25  $\mu$ M, T47D:  
 228 0.25  $\mu$ M, MCF7: 1.25  $\mu$ M, BT474: 0.25  $\mu$ M) and 2  $\mu$ M pitavastatin for 24h. **B**, Immunoblots of HMGCR,  $\beta$ -  
 229 catenin, c-Myc and  $\beta$ -actin in MDA-MB-468 and T47D cells pre-treated with DMSO, 10  $\mu$ g/mL  
 230 cycloheximide (CHX) or 10  $\mu$ M MG132 for 2 hours, followed by treatment with DMSO or 2  $\mu$ M pitavastatin  
 231 for 24 hours. **C**, Immunoblots of HMGCR,  $\beta$ -catenin, c-Myc and  $\beta$ -actin in MDA-MB-468 and T47D cells  
 232 pre-treated with DMSO, 10  $\mu$ g/mL cycloheximide (CHX) or 10  $\mu$ M MG132 for 2 hours, followed by  
 233 treatment with DMSO, AZD5363 (MDA-MB-468: 10  $\mu$ M, T47D: 0.25  $\mu$ M), 1  $\mu$ M pitavastatin or the  
 234 combination of AZD5363 and pitavastatin for 24 hours. **D**, Immunoblots of HMGCR, SREBP-2, LC3-I/II  
 235 and  $\beta$ -actin in MDA-MB-468 and T47D cells transfected with siControl (siCtrl) or siSREBF2 for 24 hours

236 followed by treatment with DMSO, 50  $\mu$ M chloroquine, 2  $\mu$ M pitavastatin or chloroquine and pitavastatin  
237 for 24 hours. **E**, MDA-MB-468 and T47D cells were co-treated with DMSO or 2  $\mu$ M pitavastatin and  
238 DMSO or 5  $\mu$ M chloroquine for 72 hours, and cell density was measured by SRB assay. Data are  
239 represented as mean  $\pm$  SD (N=3 technical replicates). Statistical analysis was performed using two-way  
240 analysis of variance (ANOVA) with Šidák's multiple comparison test to compare the mean of DMSO-  
241 treated cells to the mean of chloroquine-treated cells for each treatment (\*,  $p = 0.0332$ , \*\*\*,  $p = 0.0002$ ,  
242 \*\*\*\*,  $p < 0.0001$ ).

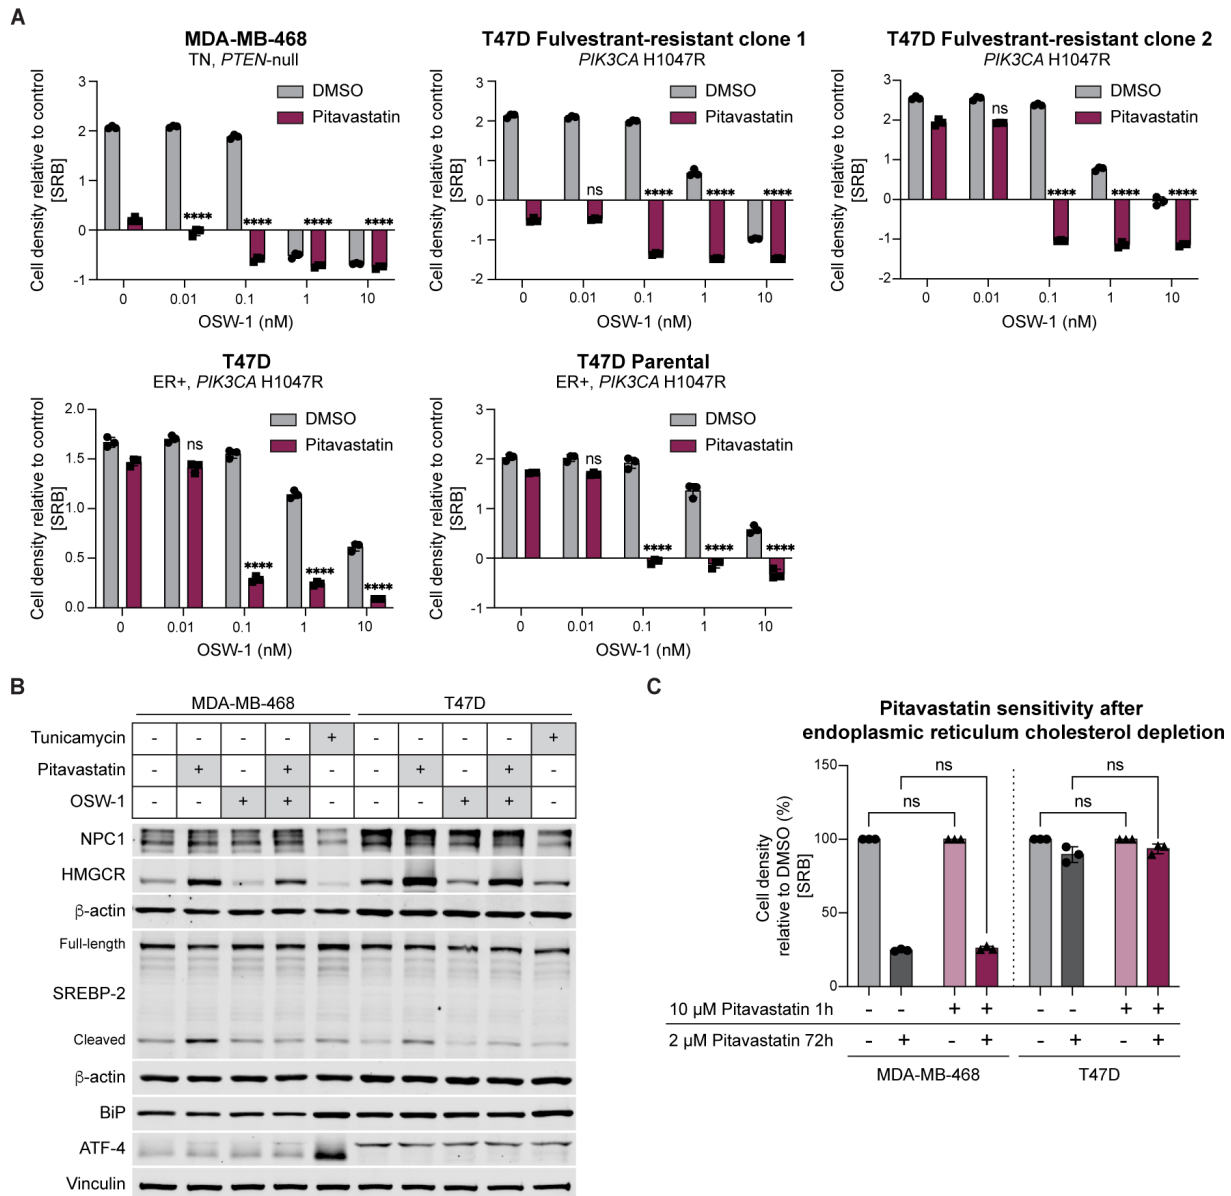

243 **Supplementary Figure S20. Accumulation of endoplasmic reticulum cholesterol sensitizes breast**  
 244 **cancer cells to pitavastatin. A**, A panel of TN (MDA-MB-468, T47D fulvestrant-resistant clones 1 and 2)  
 245 and ER-positive (T47D, parental T47D) breast cancer cells were co-treated with DMSO or 2 μM  
 246 pitavastatin and increasing concentrations of OSW-1 (0-10 nM) for 72 hours, and cell density was  
 247 measured by SRB assay. Data are represented as mean ± SD (N=3 technical replicates). Statistical  
 248 analysis was performed using two-way analysis of variance (ANOVA) with Dunnett's multiple comparison  
 249 test; asterisks (\*) indicate significant differences compared to pitavastatin treatment without OSW-1 (\*\*\*\*,  
 250 p < 0.0001). **B**, Immunoblots of NPC1, HMGCR, SREBP-2, BiP, ATF-4, β-actin and vinculin in MDA-MB-

251 468 and T47D cells treated with 2  $\mu$ M tunicamycin, 2  $\mu$ M pitavastatin, 0.1 nM OSW-1 or the combination  
252 of pitavastatin and OSW-1 for 24 hours. **C**, MDA-MB-468 and T47D cells were seeded into RPMI  
253 supplemented with 10% lipid-depleted serum and treated with 10  $\mu$ M pitavastatin for 1 hour. The media  
254 was then changed to fresh RPMI supplemented with 10% fetal bovine serum (complete serum), and cells  
255 were treated with DMSO or 2  $\mu$ M pitavastatin for 72 hours. Cell density was measured by SRB assay.  
256 Data are represented as mean  $\pm$  SD (N=3 technical replicates). Statistical analysis was performed using  
257 two-way analysis of variance (ANOVA) with Tukey's multiple comparison test.



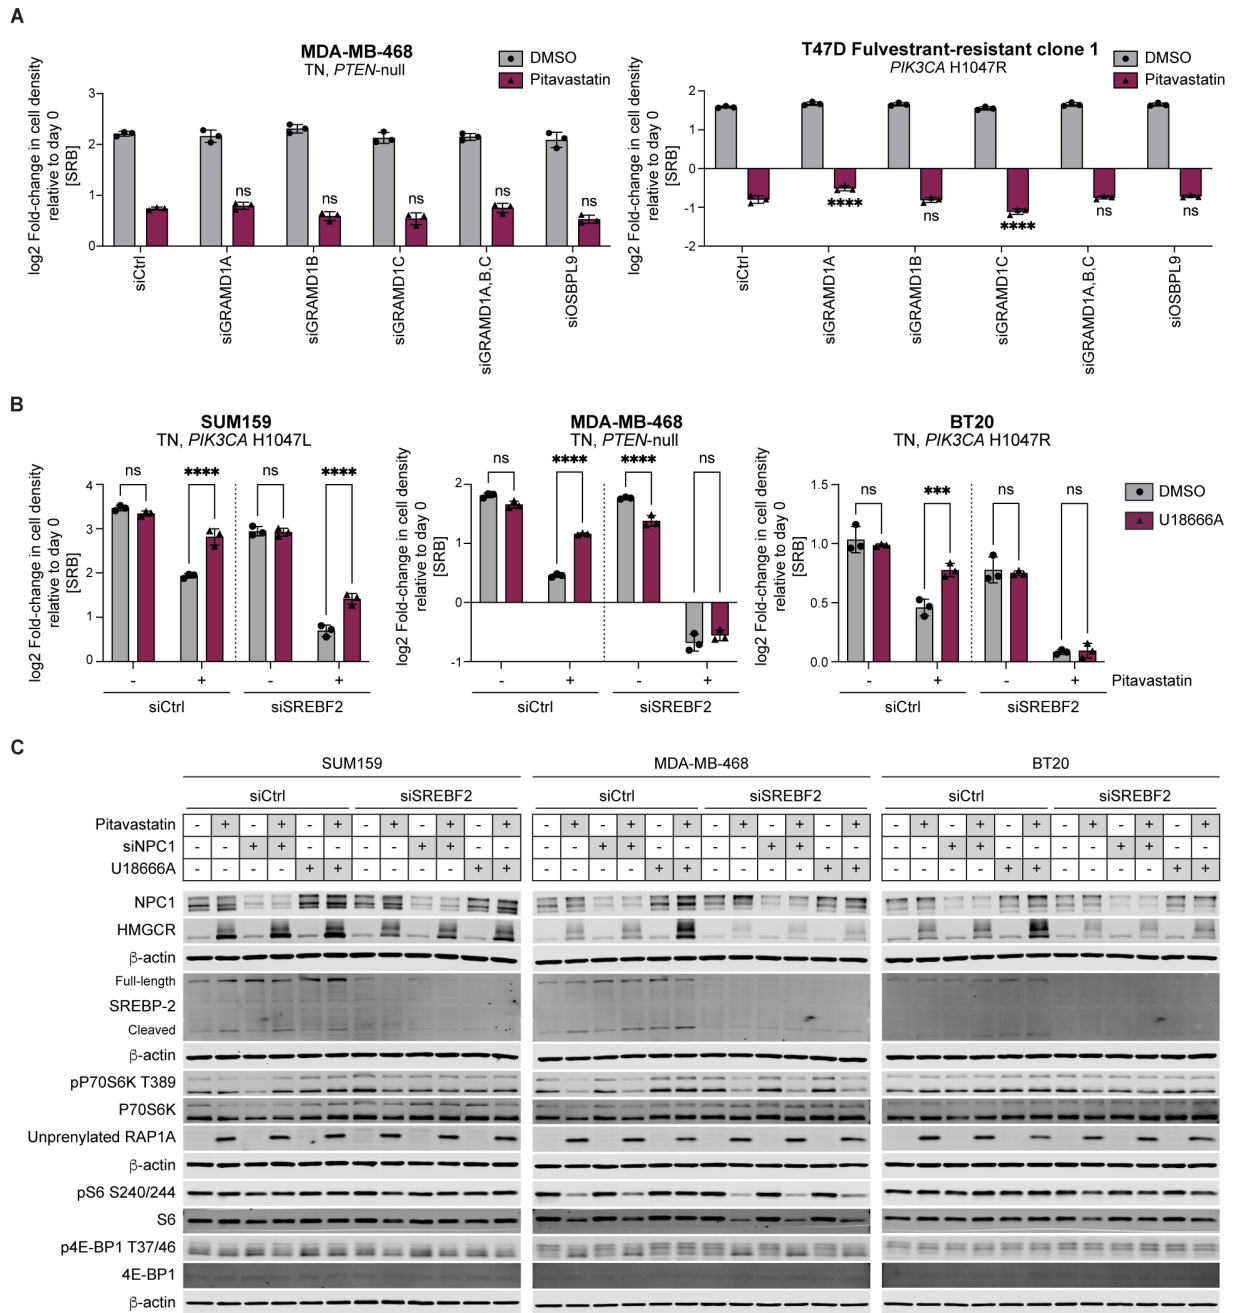

258 **Supplementary Figure S21. Depletion or inhibition of the cholesterol trafficking protein NPC1**  
 259 **rescues SREBP-2 activation after pitavastatin treatment in TNBC.** **A**, TNBC cell lines (MDA-MB-468,  
 260 fulvestrant-resistant T47D clone 1) were transfected with siControl (siCtrl), siGRAMD1A, siGRAMD1B,  
 261 siGRAMD1C, all 3 siGRAMD1s or siOSBPL9 for 24 hours and then treated with DMSO or 2  $\mu$ M  
 262 pitavastatin for 72 hours, and cell density was measured by SRB assay. Data are represented as mean  $\pm$   
 263 SD (N=3 technical replicates). Statistical analysis was performed using two-way analysis of variance

264 (ANOVA) with Dunnett's multiple comparison test; asterisks (\*) indicate significant differences compared  
265 to the pitavastatin-treated siControl (siCtrl) condition for each cell line (\*\*\*\*,  $p < 0.0001$ ). **B**, TNBC cells  
266 (SUM159, MDA-MB-468, BT20) were transfected with siControl (siCtrl) or siSREBF2 and then treated  
267 with DMSO or 1  $\mu\text{M}$  U18666A and DMSO or 2  $\mu\text{M}$  pitavastatin for 72 hours, and cell density was  
268 measured by SRB assay. Data are represented as mean  $\pm$  SD (N=3 technical replicates). Statistical  
269 analysis was performed using two-way analysis of variance (ANOVA) with Šidák's multiple comparison  
270 test (\*\*\*,  $p = 0.0002$ , \*\*\*\*,  $p < 0.0001$ ). **C**, Immunoblots of NPC1, HMGCR, SREBP-2, pP70S6K<sup>Thr389</sup>,  
271 unphosphorylated RAP1A, pS6<sup>Ser240/244</sup>, p4E-BP1<sup>Thr37/46</sup> and  $\beta$ -actin in a panel of TNBC cells (SUM159, MDA-  
272 MB-468, BT20) transfected with siControl (siCtrl) or siSREBF2 and siCtrl or siNPC1 for 24 hours and then  
273 treated with DMSO or 1  $\mu\text{M}$  U18666A and DMSO or 2  $\mu\text{M}$  pitavastatin for 24 hours.

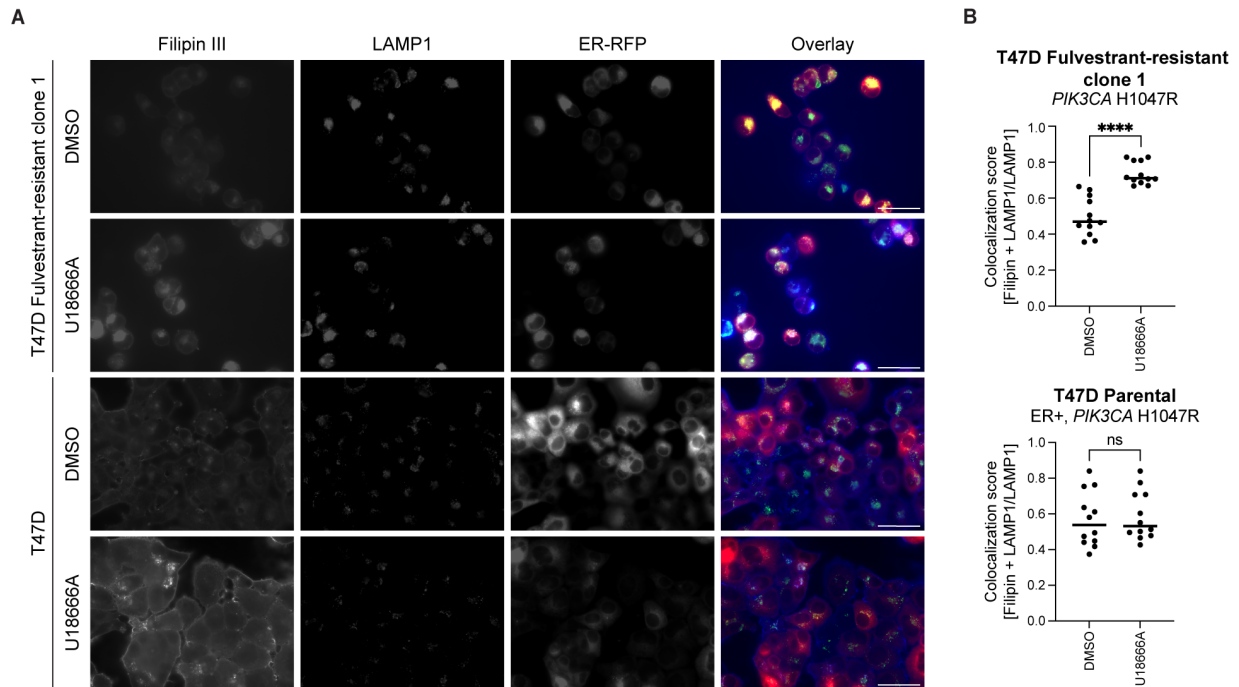

274 **Supplementary Figure S22. Fulvestrant-resistant T47D cells have dysregulated cholesterol**  
 275 **trafficking compared to parental T47D cells. A**, Fulvestrant-resistant clone 1 and parental T47D cells  
 276 expressing endoplasmic reticulum RFP (ER-RFP; red) were treated with DMSO or 1  $\mu$ M U18666A for 24  
 277 hours. Cells were fixed with 4% formaldehyde and stained with Filipin III (blue) and a LAMP1 antibody  
 278 (green). Representative images are shown. Scale bars are 50  $\mu$ m. **B**, Quantification of Filipin III and  
 279 LAMP1 co-localization normalized to total LAMP1 from 12 non-overlapping fields. Statistical analysis was  
 280 performed using an unpaired, two-tailed parametric t-test (\*\*\*\*,  $p < 0.0001$ ).  
 281

**Supplementary Table S1. Patient-derived organoid characteristics.**

| Patient | Pathology                                   | Mutations            |
|---------|---------------------------------------------|----------------------|
| 4       | Triple-negative breast cancer (primary)     | -                    |
| 8       | ER-positive metastatic breast cancer (bone) | <i>PIK3CA</i> H1047R |
| 10      | ER-low metastatic breast cancer (ascites)   | <i>AKT</i> E17K      |
| 26      | ER-positive metastatic breast cancer (bone) | -                    |
| 27      | ER-positive invasive ductal carcinoma       | -                    |

**Supplementary Table S2. RT-qPCR primers.**

| Gene  | Forward Primer                 | Reverse Primer             |
|-------|--------------------------------|----------------------------|
| 18S   | 5'-CTTAGAGGGACAAGTGGCG-3'      | 5'-ACGCTGAGCCAGTCAGTGTA-3' |
| HMGCR | 5'-TCTAGTGAGATCTGGAGGATCCAA-3' | 5'-AGGGATGGGAGGCCACAAAG-3' |

**Supplementary Table S3. Plasmids.**

| Plasmid          | Source                                                                                                                    | Selection Marker |
|------------------|---------------------------------------------------------------------------------------------------------------------------|------------------|
| pHAGE-ESR1       | Addgene, 116737                                                                                                           | Puromycin        |
| pLenti6/V5-HMGCR | Cloned HMGCR from pCMV-SPORT6-hHMGCR1 (Addgene, 86085) into pLenti6/V5-p53_wt p53 (Gift from Muranen Lab; Addgene, 22945) | Blasticidin      |
| pLenti6-ER-mRFP  | Cloned ER-mRFP from ER-mRFP (Addgene, 62236) into pLenti6/V5-p53_wt p53 (Gift from Muranen lab; Addgene, 22945)           | Blasticidin      |

**Supplementary Table S4. Antibodies for immunoblotting.**

|                  | Antibody           | Manufacturer              | Identifier    | Host   | Dilution |
|------------------|--------------------|---------------------------|---------------|--------|----------|
| Primary antibody | PARP               | Cell Signaling Technology | 9542          | Rabbit | 1:1000   |
|                  | pAKT S473          | Cell Signaling Technology | 4060          | Rabbit | 1:1000   |
|                  | pAKT T308          | Cell Signaling Technology | 2965          | Rabbit | 1:1000   |
|                  | AKT                | Cell Signaling Technology | 4691          | Rabbit | 1:1000   |
|                  | pPRAS40 T246       | Cell Signaling Technology | 2997          | Rabbit | 1:1000   |
|                  | PRAS40             | Cell Signaling Technology | 2691          | Rabbit | 1:1000   |
|                  | pGSK3 $\beta$ S9   | Cell Signaling Technology | 9336          | Rabbit | 1:1000   |
|                  | GSK3 $\beta$       | Cell Signaling Technology | 9315          | Rabbit | 1:1000   |
|                  | pS6                | Cell Signaling Technology | 5364          | Rabbit | 1:1000   |
|                  | S6                 | Cell Signaling Technology | 2217          | Rabbit | 1:1000   |
|                  | pP70S6K            | Cell Signaling Technology | 9234          | Rabbit | 1:1000   |
|                  | P70S6K             | Cell Signaling Technology | 2708          | Rabbit | 1:1000   |
|                  | p4E-BP1            | Cell Signaling Technology | 2855          | Rabbit | 1:1000   |
|                  | 4E-BP1             | Cell Signaling Technology | 9452          | Rabbit | 1:1000   |
|                  | Unprenylated RAP1A | Santa Cruz Biotechnology  | sc-373968     | Mouse  | 1:50     |
|                  | RHEB               | Abnova                    | H00006009-M01 | Mouse  | 1:50     |
|                  | HDJ2               | ThermoFisher Scientific   | MA5-12748     | Mouse  | 1:1000   |
|                  | PARP               | Cell Signaling Technology | 9542          | Rabbit | 1:1000   |
|                  | Cleaved caspase-3  | Cell Signaling Technology | 9664          | Rabbit | 1:1000   |
|                  | NPC1               | Cell Signaling Technology | 33422         | Rabbit | 1:1000   |
|                  | HMGCR              | Invitrogen                | MA5-31336     | Mouse  | 1:1000   |
|                  | SREBP-1            | Abcam                     | ab28481       | Mouse  | 1:500    |

|                    |                                                 |                           |           |        |          |
|--------------------|-------------------------------------------------|---------------------------|-----------|--------|----------|
|                    | SREBP-2                                         | BD Biosciences            | 557037    | Mouse  | 1:250    |
|                    | Estrogen receptor $\alpha$ (ER $\alpha$ )       | Cell Signaling Technology | 8644      | Rabbit | 1:1000   |
|                    | c-Myc                                           | Cell Signaling Technology | 5605      | Rabbit | 1:1000   |
|                    | $\beta$ -catenin                                | Cell Signaling Technology | 8480      | Rabbit | 1:1000   |
|                    | LC3-I/II                                        | Cell Signaling Technology | 4108      | Rabbit | 1:1000   |
|                    | BiP                                             | Cell Signaling Technology | 3183      | Rabbit | 1:1000   |
|                    | ATF-4                                           | Cell Signaling Technology | 11815     | Rabbit | 1:1000   |
|                    | $\beta$ -actin                                  | Cell Signaling Technology | 4970      | Rabbit | 1:3000   |
|                    | Vinculin                                        | Cell Signaling Technology | 13901     | Rabbit | 1:1000   |
| Secondary antibody | IRDye® 800CW<br>Goat anti-Rabbit<br>IgG (H + L) | LI-COR                    | 926-32211 | Goat   | 1:20,000 |
|                    | IRDye® 800CW<br>Goat anti-Mouse<br>IgG (H + L)  | LI-COR                    | 926-32210 | Goat   | 1:20,000 |
|                    | IRDye® 680CW<br>Goat anti-Rabbit<br>IgG (H + L) | LI-COR                    | 926-68021 | Goat   | 1:20,000 |
|                    | IRDye® 680CW<br>Goat anti-Mouse<br>IgG (H + L)  | LI-COR                    | 926-68070 | Goat   | 1:20,000 |



**Supplementary Table S5. siRNA Product information.**

| Target                              | siRNA      | Sequence                                                                                      | Horizon Discovery Catalog ID |
|-------------------------------------|------------|-----------------------------------------------------------------------------------------------|------------------------------|
| SREBF1                              | Individual | GCGCACUGCUGUCCACAAA                                                                           | J-006891-05-0005             |
| SREBF2                              | Individual | GCACACUGGUUGAGAUCCA                                                                           | J-009549-05-0005             |
| HMGCR                               | Pool       | GUGAGAAUGUUUUUGGAUA,<br>GGUCGAAGAUCUUUUACA,<br>GAACAAGUUUUACCCUAA,<br>GAGCAGUGACAUUUAAUU      | L-009811-00-0005             |
| NPC1                                | Pool       | GGACAACUUAUACCCGAAUA,<br>GAAGAAAGCCCGACUUUAU,<br>GCGAACGGCUUCUAAAUUU,<br>GAUGAGACCAAUUGUGAUA  | L-008047-00-0005             |
| GRAMD1A                             | Individual | CCACUUUAUAGCAGCGUAA                                                                           | J-014143-17-0005             |
| GRAMD1B                             | Individual | GAGUGAAUGUUACGUGAUA                                                                           | J-026529-13-0005             |
| GRAMD1C                             | Individual | GUAUAAAGAAAGUCGGGAA                                                                           | J-020545-17-0005             |
| OSBPL9                              | Individual | CCAAAGCGCUUAAUAGAUU                                                                           | J-009912-05-0005             |
| ON-TARGETplus<br>Non-targeting Pool | Pool       | UGUUUUACAUGUCGACUAA,<br>UGUUUUACAUGUUGUGUGA,<br>UGUUUUACAUGUUUUUCUGA,<br>UGUUUUACAUGUUUUCCUA, | D-001810-10-20               |

**Supplementary Table S6. Key reagents.**

| Reagent                   | Supplier                                                                              | Product number                                          |
|---------------------------|---------------------------------------------------------------------------------------|---------------------------------------------------------|
| BYL719                    | Active Biochem                                                                        | A-1214                                                  |
| GDC-0068                  | MedChemExpress                                                                        | RG7440                                                  |
| AZD5363<br>(capiwasertib) | Cayman Chemicals ( <i>in vitro</i> studies),<br>AstraZeneca ( <i>in vivo</i> studies) | 15406                                                   |
| ARQ 092                   | Cayman Chemicals                                                                      | 1313881-70-7                                            |
| MK-2206                   | Cayman Chemicals                                                                      | 11593                                                   |
| Torin 1                   | Tocris Bioscience                                                                     | 4247                                                    |
| Lovastatin                | Selleckchem                                                                           | S2061                                                   |
| Rosuvastatin              | Selleckchem                                                                           | S2169                                                   |
| Pitavastatin              | Selleckchem                                                                           | S1759                                                   |
| Bortezomib                | Cayman Chemicals                                                                      | 10008822                                                |
| Fulvestrant               | Selleckchem                                                                           | S1191                                                   |
| GGTI-298                  | Selleckchem                                                                           | S7466                                                   |
| FTI-277                   | Selleckchem                                                                           | S7465                                                   |
| Fatostatin                | Selleckchem                                                                           | S9785                                                   |
| Cycloheximide             | Cayman Chemicals                                                                      | 14126                                                   |
| MG132                     | Cayman Chemicals                                                                      | 10012628                                                |
| Chloroquine               | Sigma-Aldrich                                                                         | C6628                                                   |
| Tunicamycin               | Sigma-Aldrich                                                                         | T7765                                                   |
| U18666A                   | Cayman Chemicals                                                                      | Cholesterol Cell-Based Detection Assay Kit,<br>10009779 |
| OSW-1                     | MedChemExpress                                                                        | HY-101213                                               |
| Mevalonate                | Sigma-Aldrich                                                                         | 90469                                                   |
| GGPP                      | Cayman Chemicals                                                                      | 63330                                                   |
| Cholesterol               | Sigma-Aldrich                                                                         | C4951                                                   |

|             |                  |                                                         |
|-------------|------------------|---------------------------------------------------------|
| Filipin III | Cayman Chemicals | Cholesterol Cell-Based Detection Assay Kit,<br>10009779 |
| Puromycin   | Corning          | 61-385-RA                                               |
| Blasticidin | InvivoGen        | ant-bl-1                                                |
